# Supplementary material for: Synthesis and photophysical properties of 5-(3′′-alkyl/aryl-amino-1′′-azaindolizin-2′′-yl)-2′-deoxyuridines
Source: Royal Society of Chemistry journal article supplement (doi:10.1039/d1nj02423j), 2021-01-01
Supplement: d1nj02423j1.pdf [file d1nj02423j1.pdf]

## Synthesis and photophysical properties of 5-(3''-alkyl/aryl-amino-1''-azaindolizin-2''-yl)-2'-deoxyuridines

Sandeep Kumar,<sup>a</sup> Sumit Kumar,<sup>a</sup> Jyotirmoy Maity,<sup>b</sup> Banty Kumar,<sup>c</sup>

Shilpika Bali Mehta<sup>d</sup> and Ashok K. Prasad<sup>a,\*</sup>

<sup>a</sup>Bioorganic Laboratory, <sup>b</sup>St. Stephen's College, <sup>c</sup>Rajdhani College, <sup>d</sup>Kalindi College  
Department of Chemistry, University of Delhi, Delhi, India  
Email: [ashokenzyme@gmail.com](mailto:ashokenzyme@gmail.com)

|                                                                        |    |
|------------------------------------------------------------------------|----|
| Table of contents                                                      | 1  |
| <sup>1</sup> H- and <sup>13</sup> C-NMR spectra of compound <b>11a</b> | 3  |
| <sup>1</sup> H- and <sup>13</sup> C-NMR spectra of compound <b>11b</b> | 4  |
| <sup>1</sup> H- and <sup>13</sup> C-NMR spectra of compound <b>11c</b> | 5  |
| <sup>1</sup> H- and <sup>13</sup> C-NMR spectra of compound <b>11d</b> | 6  |
| <sup>1</sup> H- and <sup>13</sup> C-NMR spectra of compound <b>11e</b> | 7  |
| <sup>1</sup> H- and <sup>13</sup> C-NMR spectra of compound <b>11f</b> | 8  |
| <sup>1</sup> H- and <sup>13</sup> C-NMR spectra of compound <b>11g</b> | 9  |
| <sup>1</sup> H- and <sup>13</sup> C-NMR spectra of compound <b>11h</b> | 10 |
| <sup>1</sup> H- and <sup>13</sup> C-NMR spectra of compound <b>11i</b> | 11 |
| <sup>1</sup> H- and <sup>13</sup> C-NMR spectra of compound <b>11j</b> | 12 |
| <sup>1</sup> H- and <sup>13</sup> C-NMR spectra of compound <b>11k</b> | 13 |
| <sup>1</sup> H- and <sup>13</sup> C-NMR spectra of compound <b>11l</b> | 14 |
| <sup>1</sup> H- and <sup>13</sup> C-NMR spectra of compound <b>11m</b> | 15 |
| <sup>1</sup> H- and <sup>13</sup> C-NMR spectra of compound <b>11n</b> | 16 |
| <sup>1</sup> H- and <sup>13</sup> C-NMR spectra of compound <b>11p</b> | 17 |
| <sup>1</sup> H- and <sup>13</sup> C-NMR spectra of compound <b>5a</b>  | 18 |
| <sup>1</sup> H- and <sup>13</sup> C-NMR spectra of compound <b>5b</b>  | 19 |
| <sup>1</sup> H- and <sup>13</sup> C-NMR spectra of compound <b>5c</b>  | 20 |
| <sup>1</sup> H- and <sup>13</sup> C-NMR spectra of compound <b>5d</b>  | 21 |
| <sup>1</sup> H- and <sup>13</sup> C-NMR spectra of compound <b>5e</b>  | 22 |
| <sup>1</sup> H- and <sup>13</sup> C-NMR spectra of compound <b>5f</b>  | 23 |
| <sup>1</sup> H- and <sup>13</sup> C-NMR spectra of compound <b>5g</b>  | 24 |
| <sup>1</sup> H- and <sup>13</sup> C-NMR spectra of compound <b>5h</b>  | 25 |
| COSY and HETCOR-NMR spectra of compound <b>5h</b>                      | 26 |
| <sup>1</sup> H- and <sup>13</sup> C-NMR spectra of compound <b>5i</b>  | 27 |

|                                                                       |    |
|-----------------------------------------------------------------------|----|
| $^1\text{H}$ - and $^{13}\text{C}$ -NMR spectra of compound <b>5j</b> | 28 |
| $^1\text{H}$ - and $^{13}\text{C}$ -NMR spectra of compound <b>5k</b> | 29 |
| $^1\text{H}$ - and $^{13}\text{C}$ -NMR spectra of compound <b>5l</b> | 30 |
| $^1\text{H}$ - and $^{13}\text{C}$ -NMR spectra of compound <b>5m</b> | 31 |
| $^1\text{H}$ - and $^{13}\text{C}$ -NMR spectra of compound <b>5n</b> | 32 |
| $^1\text{H}$ - and $^{13}\text{C}$ -NMR spectra of compound <b>5o</b> | 33 |
| $^1\text{H}$ - and $^{13}\text{C}$ -NMR spectra of compound <b>5p</b> | 34 |

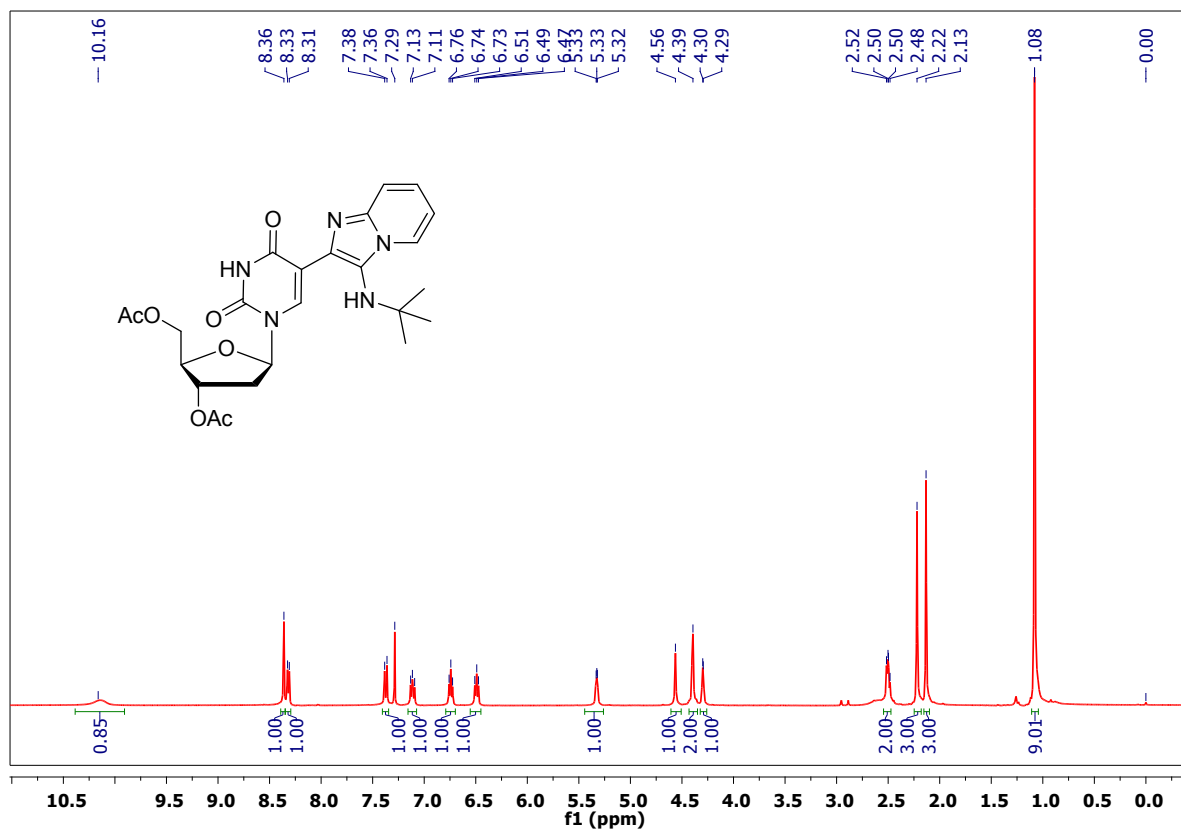

**Figure 1:** <sup>1</sup>H NMR spectrum of compound 11a (400 MHz, CDCl<sub>3</sub>)

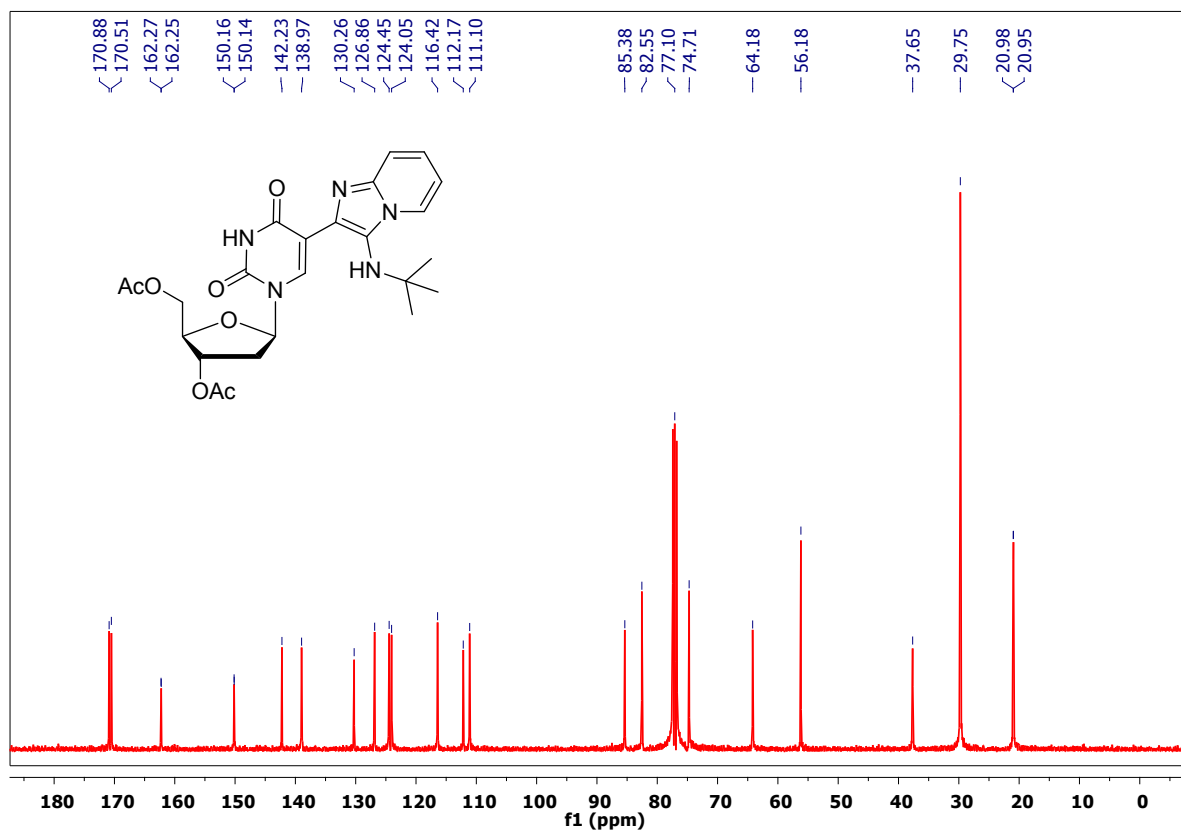

**Figure 2:**  $^{13}\text{C}$  NMR spectrum of compound **11a** (100 MHz,  $\text{CDCl}_3$ )

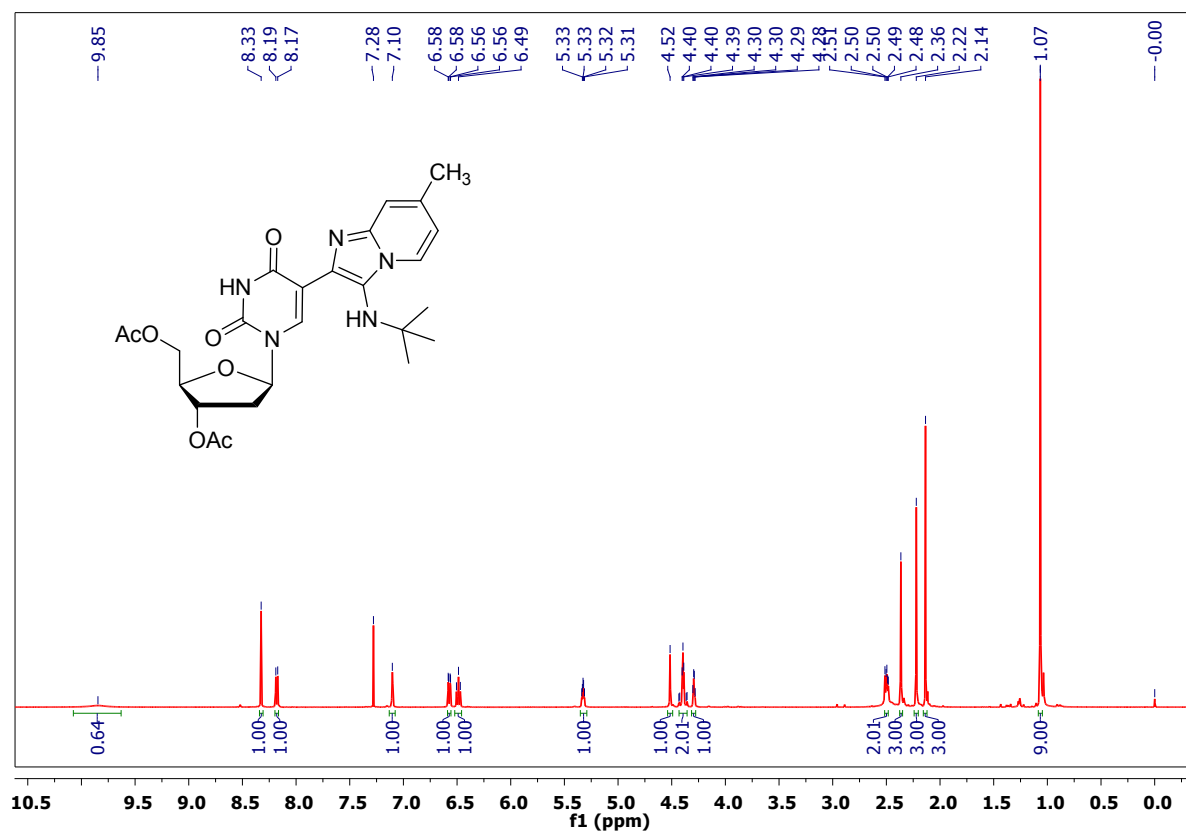

**Figure 3:**  $^1\text{H}$  NMR spectrum of compound **11b** (400 MHz,  $\text{CDCl}_3$ )

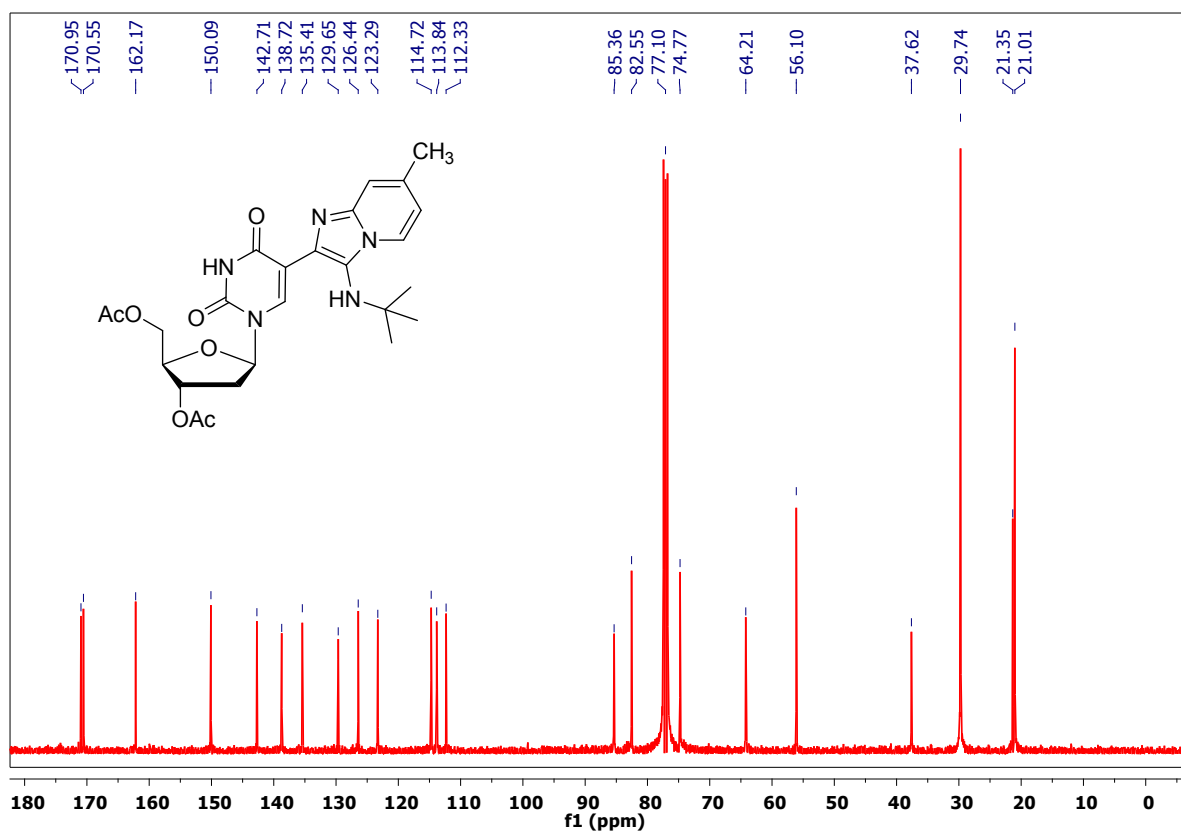

Figure 4: <sup>13</sup>C NMR spectrum of compound 11b (100 MHz, CDCl<sub>3</sub>)

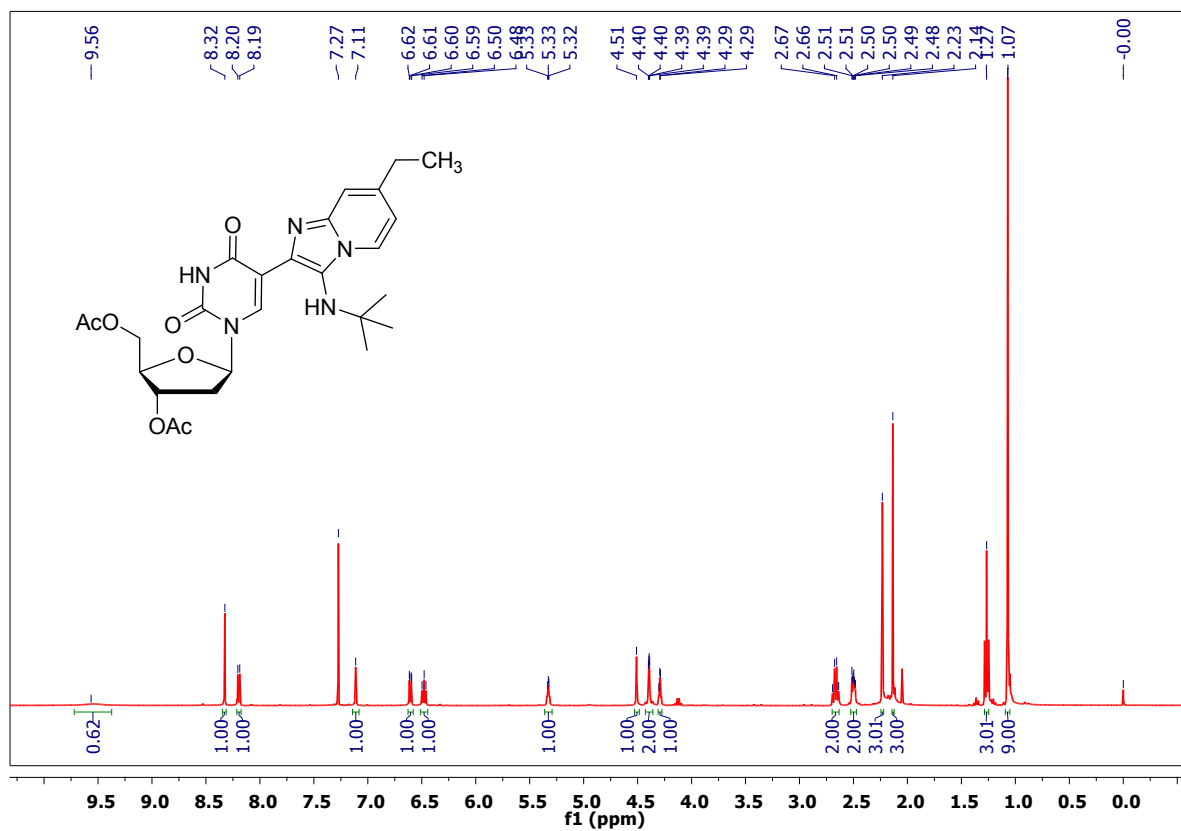

**Figure 5:**  $^1\text{H}$  NMR spectrum of compound **11c** (400 MHz,  $\text{CDCl}_3$ )

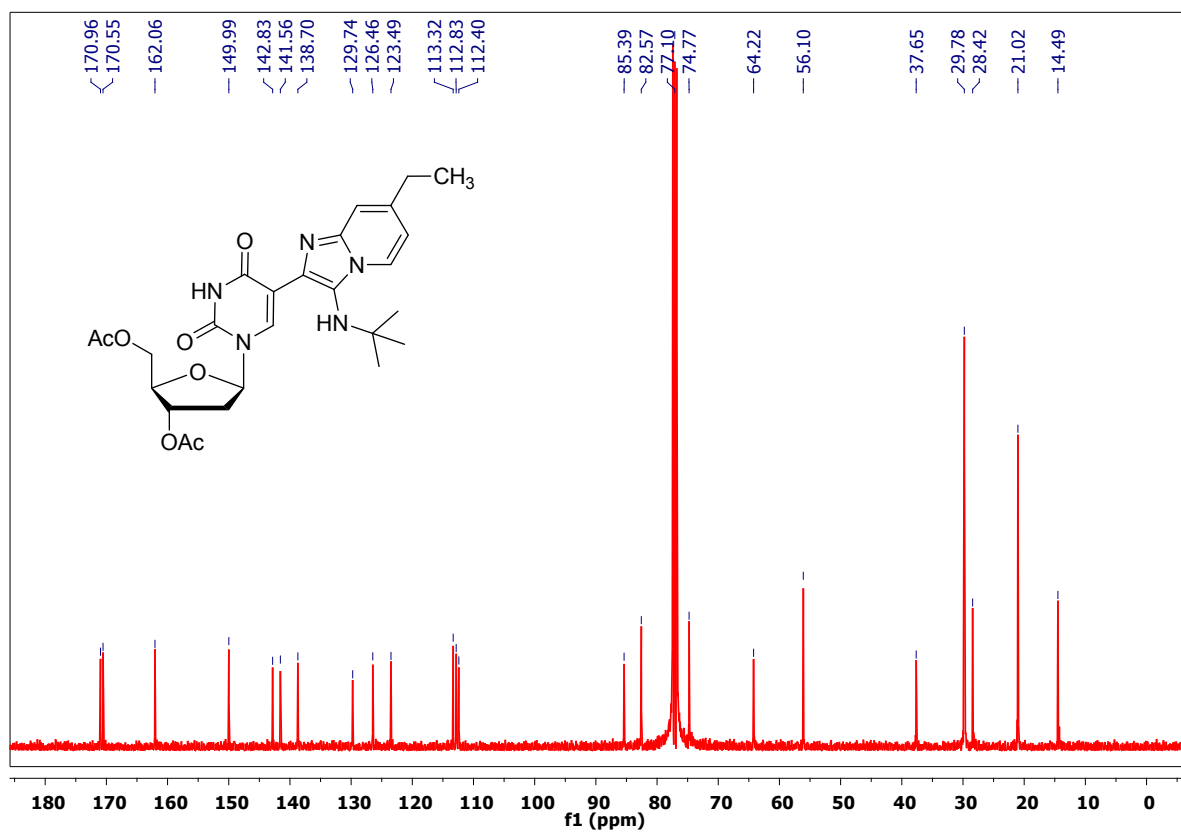

**Figure 6:**  $^{13}\text{C}$  NMR spectrum of compound **11c** (100 MHz,  $\text{CDCl}_3$ )

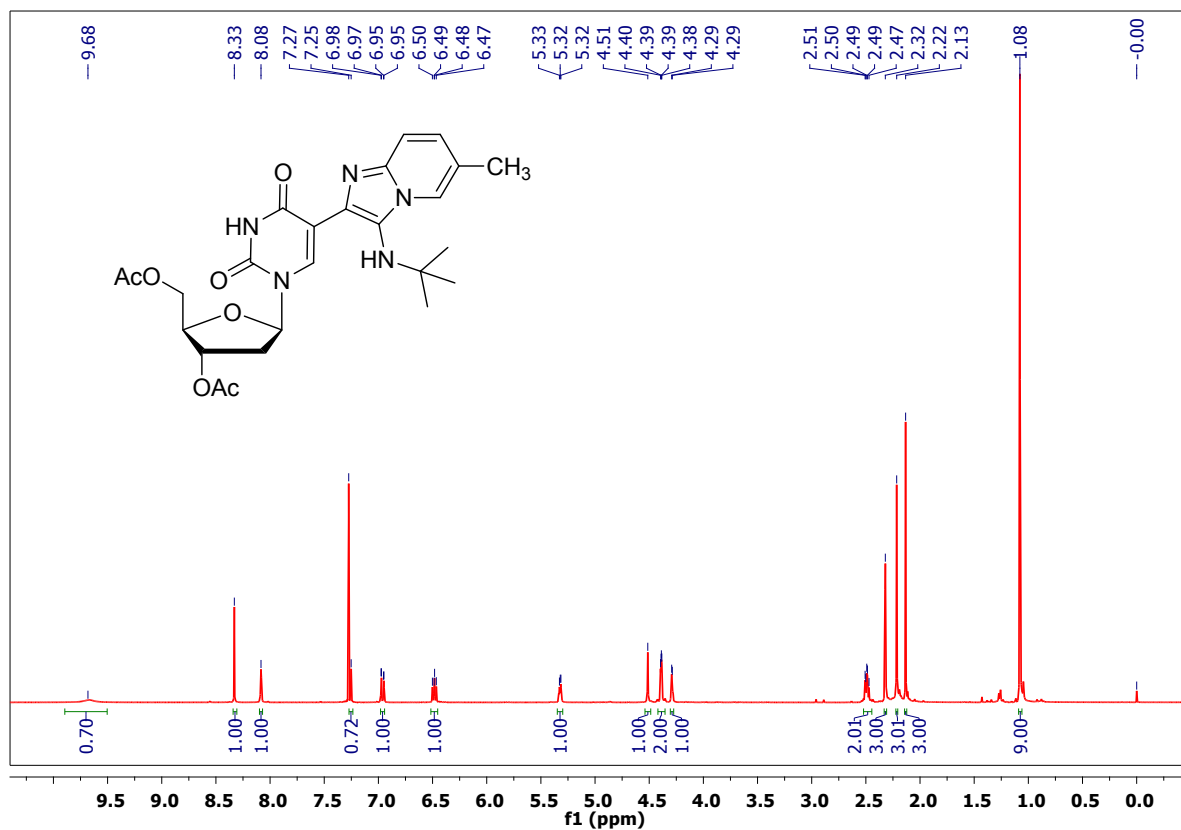

**Figure 7:** <sup>1</sup>H NMR spectrum of compound **11d** (400 MHz, CDCl<sub>3</sub>)

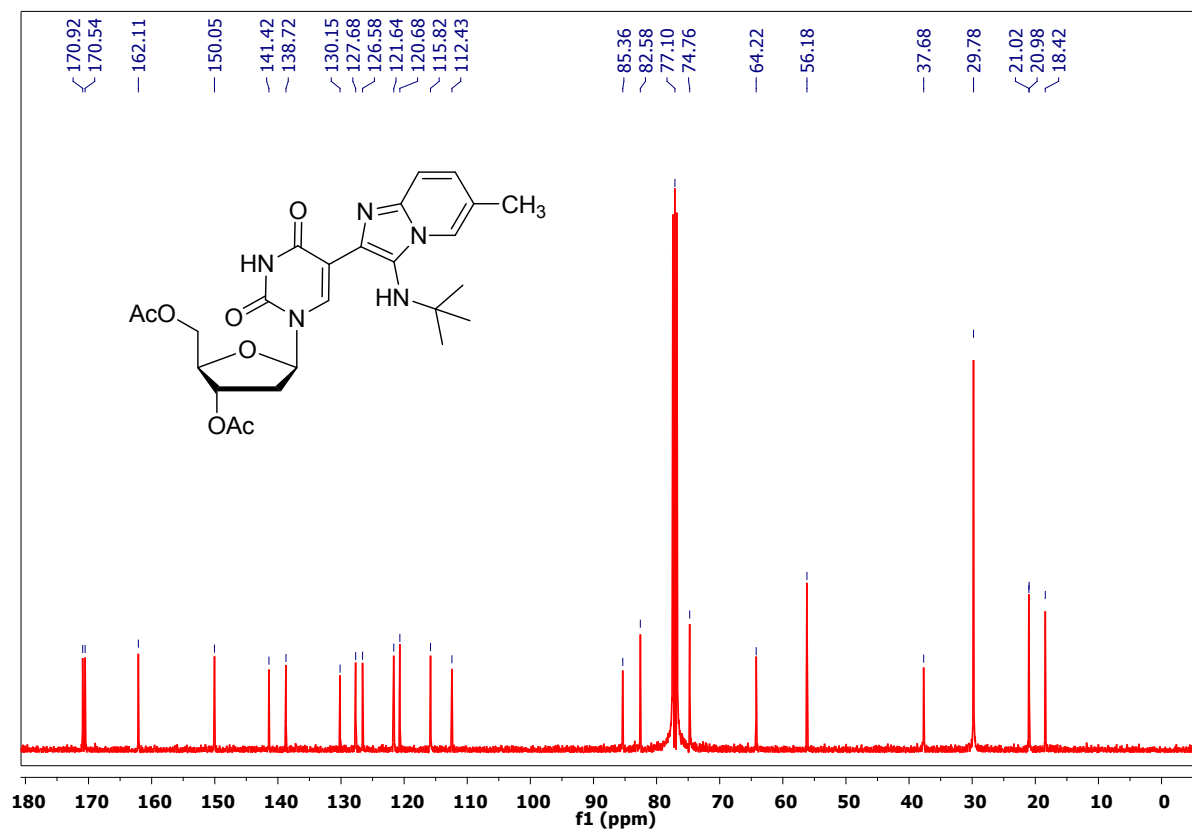

**Figure 8:**  $^{13}\text{C}$  NMR spectrum of compound **11d** (100 MHz,  $\text{CDCl}_3$ )

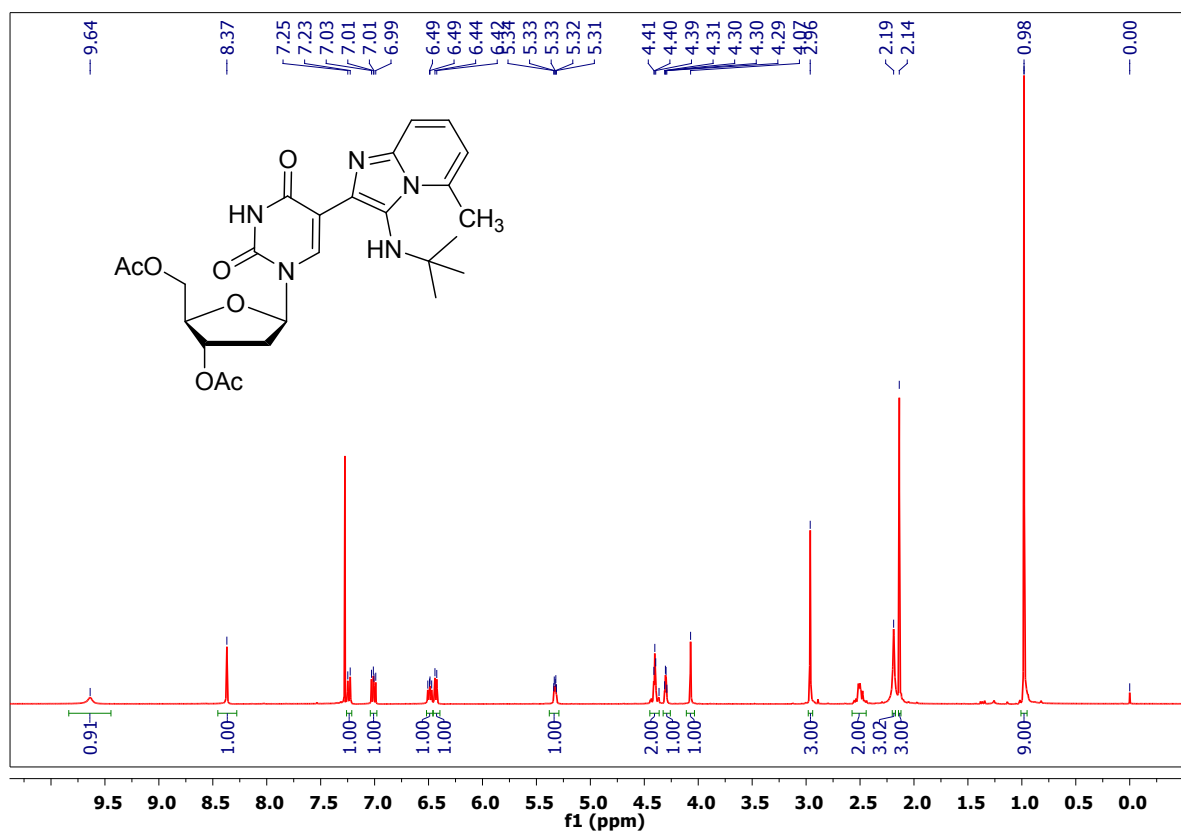

**Figure 9:**  $^1\text{H}$  NMR spectrum of compound **11e** (400 MHz,  $\text{CDCl}_3$ )



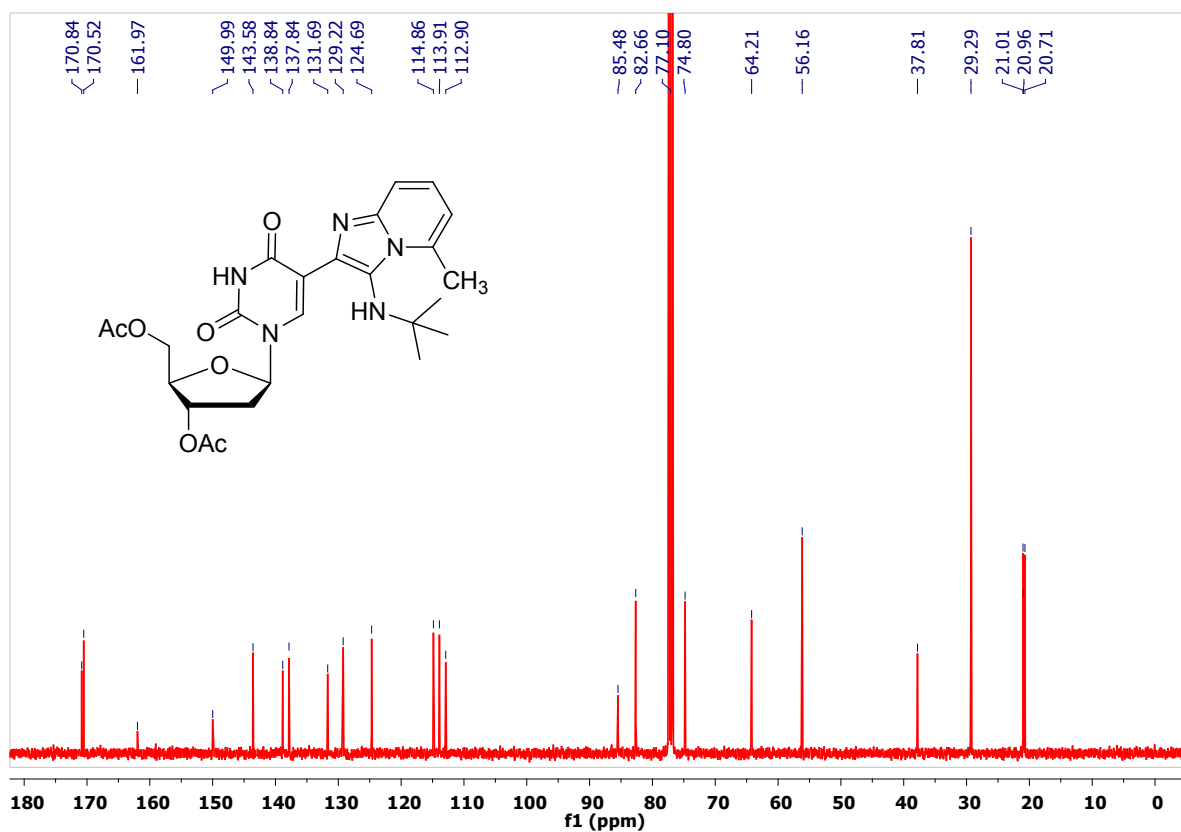

**Figure 10:  $^{13}\text{C}$  NMR spectrum of compound 11e (100 MHz,  $\text{CDCl}_3$ )**

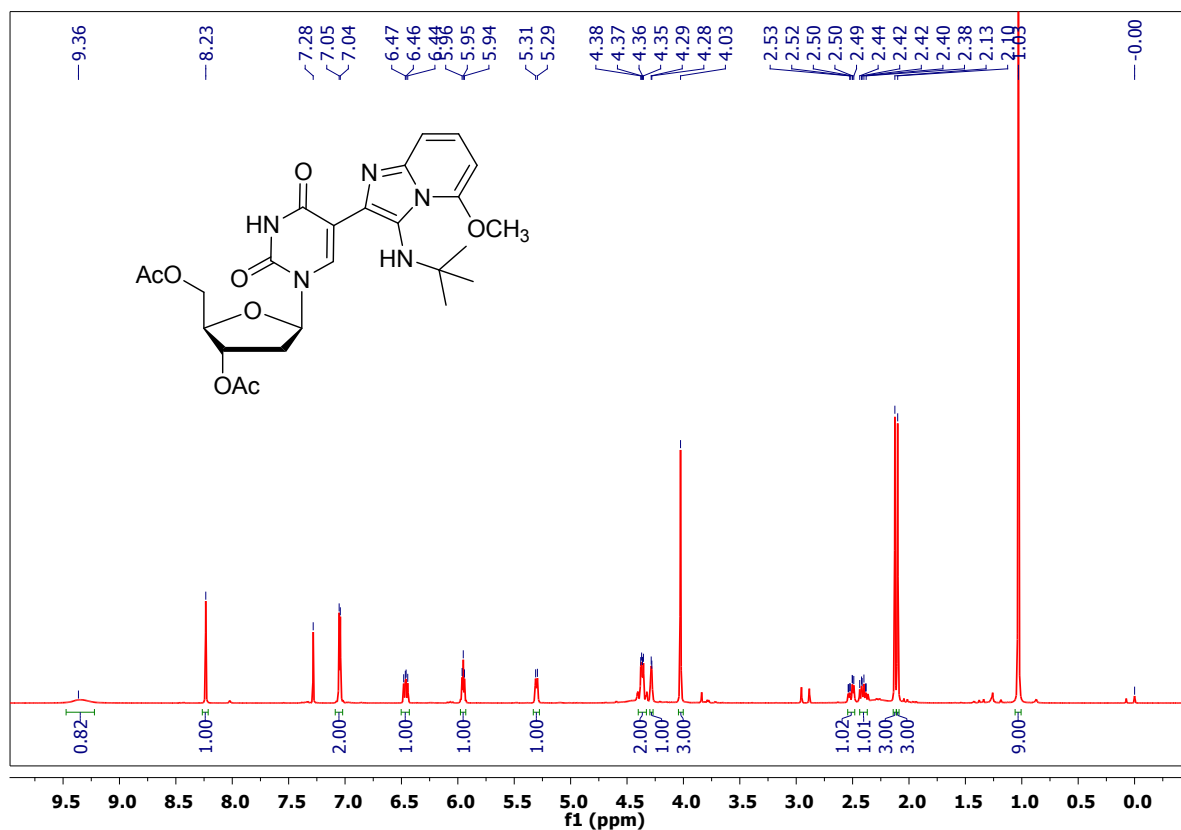

**Figure 11:**  $^1\text{H}$  NMR spectrum of compound **11f** (400 MHz,  $\text{CDCl}_3$ )

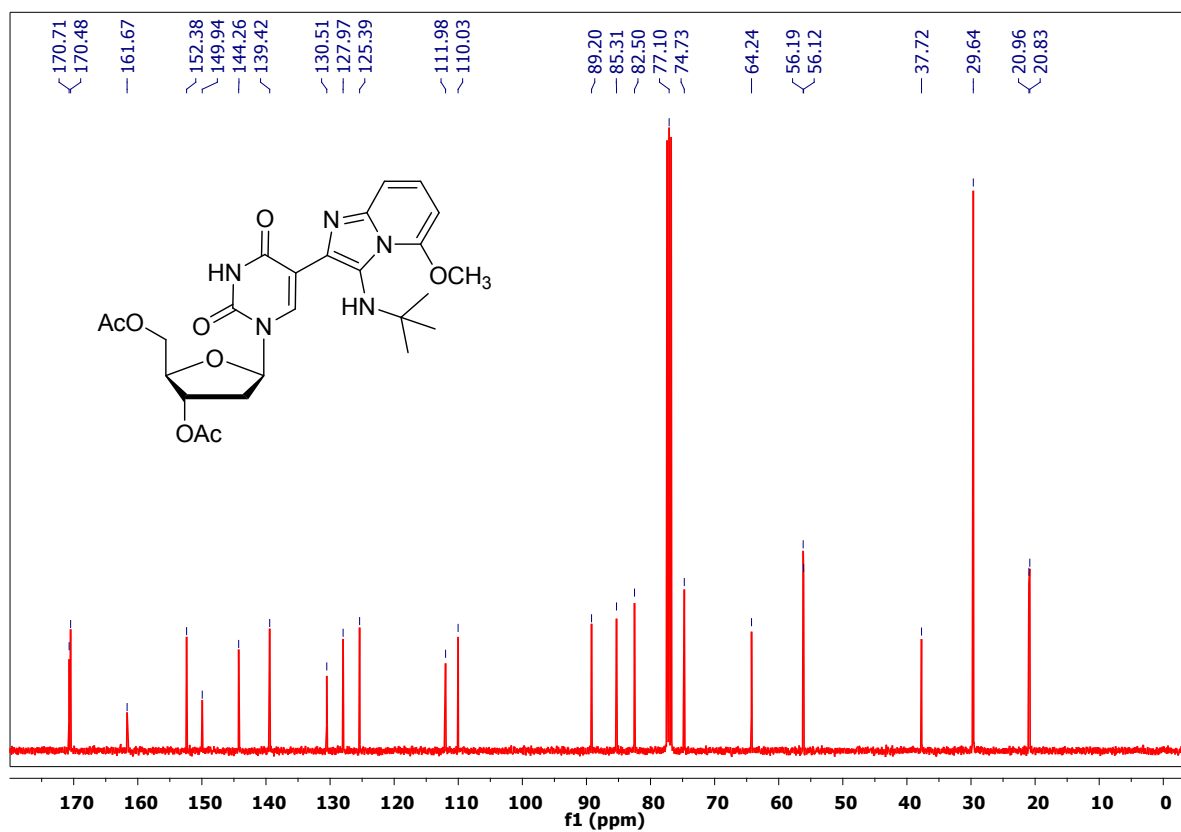

**Figure 12:**  $^{13}\text{C}$  NMR spectrum of compound **11f** (100 MHz,  $\text{CDCl}_3$ )

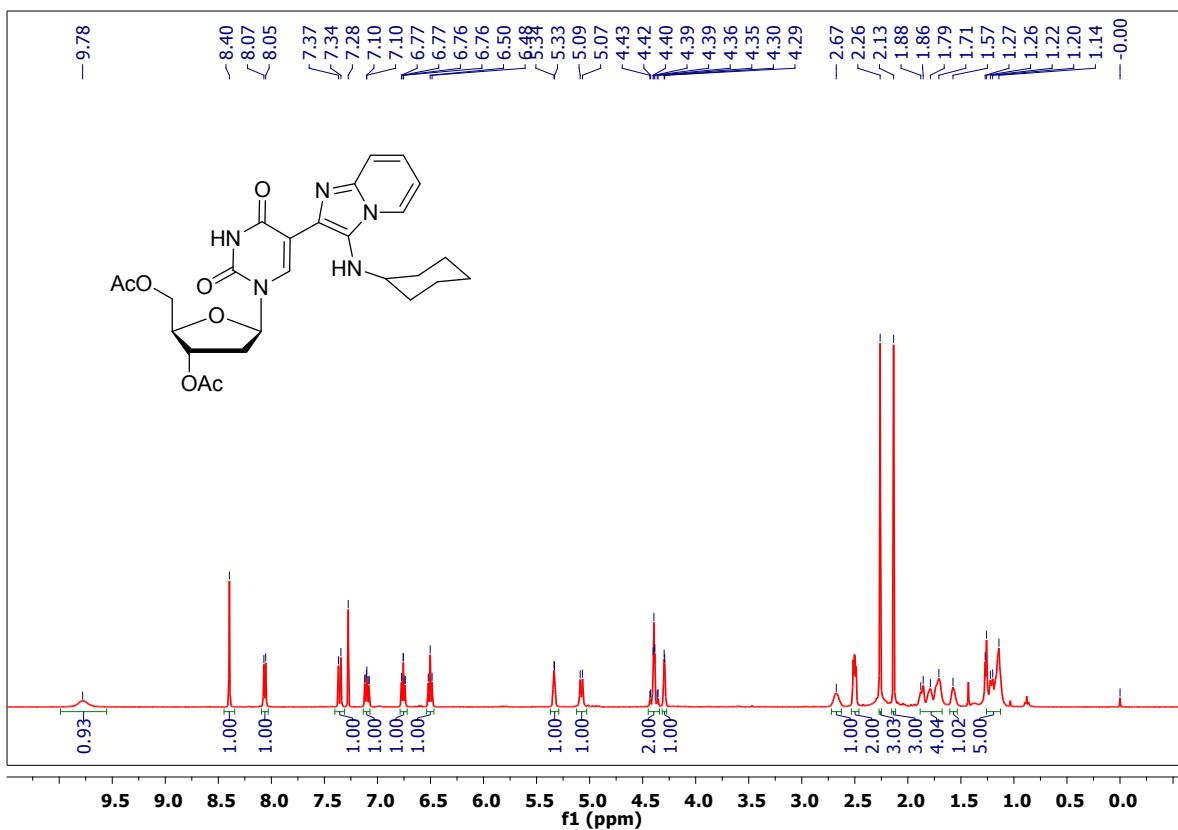

Figure 13: <sup>1</sup>H NMR spectrum of compound **11g** (400 MHz, CDCl<sub>3</sub>)

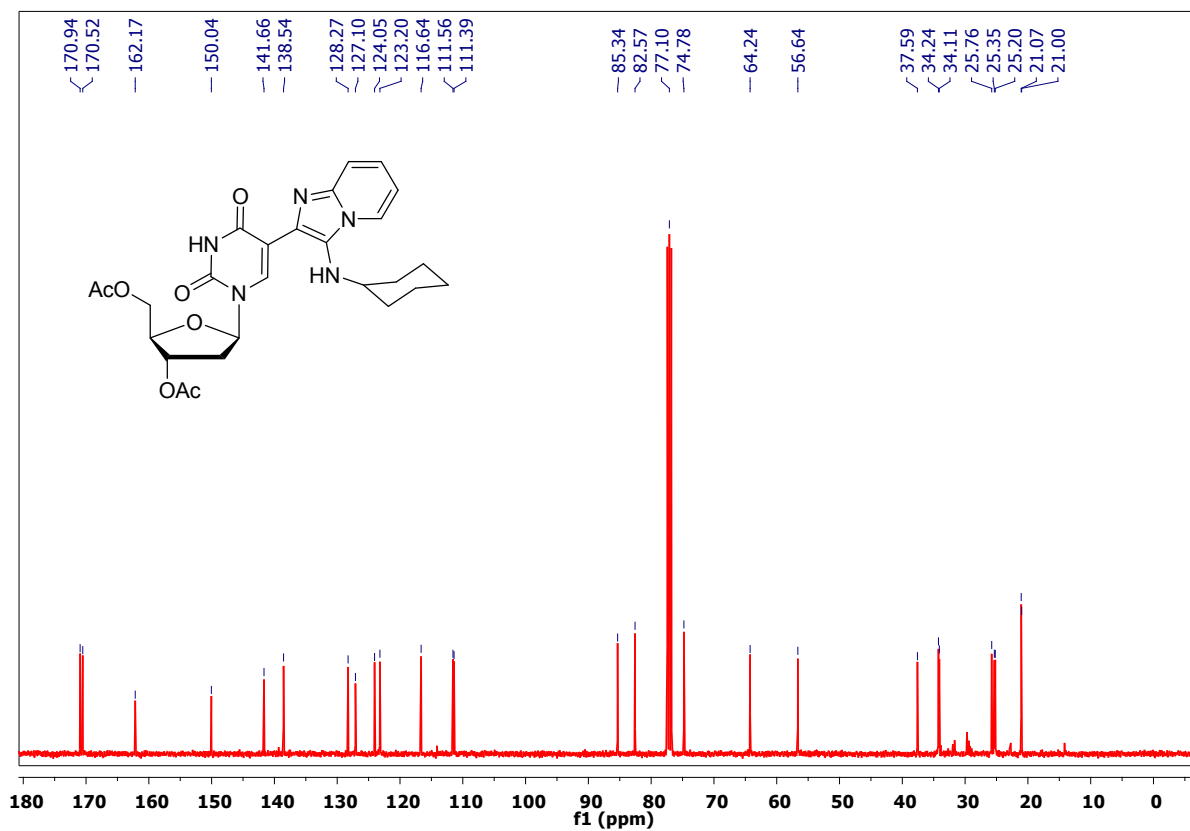

**Figure 14:**  $^{13}\text{C}$  NMR spectrum of compound **11g** (100 MHz,  $\text{CDCl}_3$ )

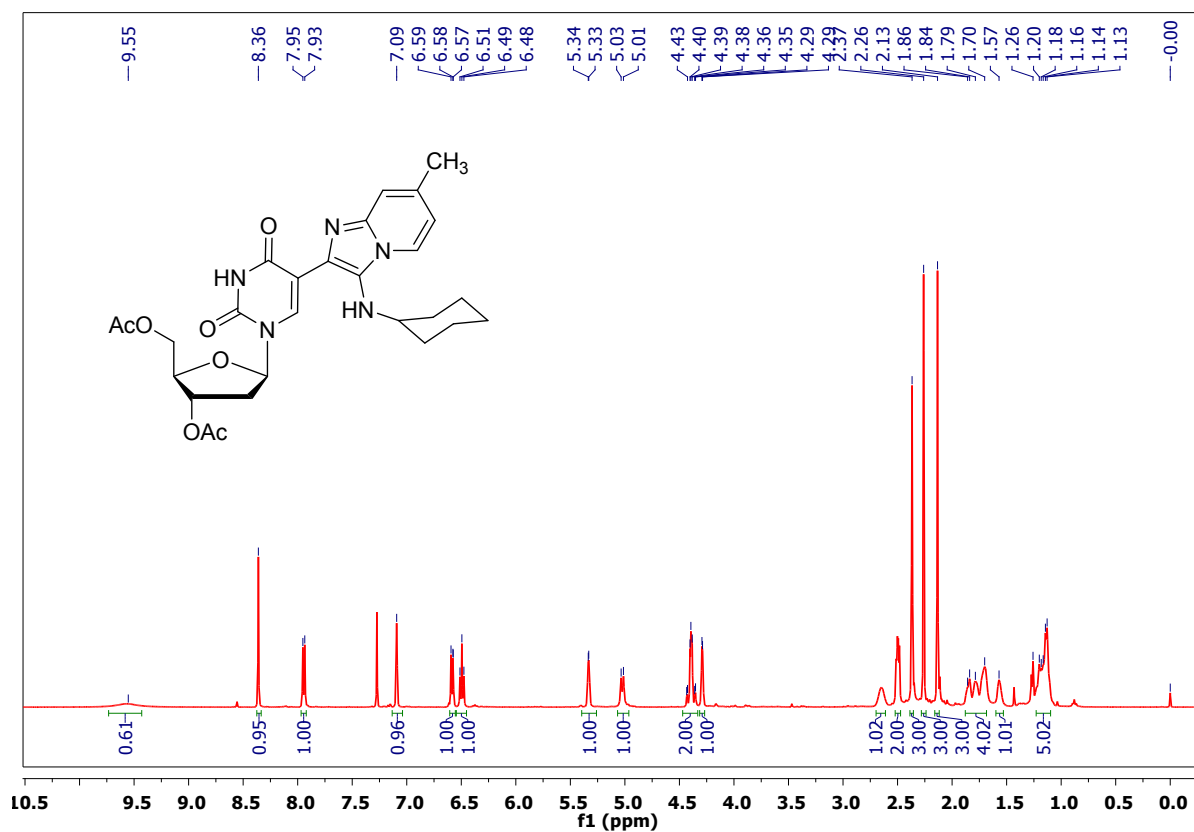

**Figure 15:**  $^1\text{H}$  NMR spectrum of compound **11h** (400 MHz,  $\text{CDCl}_3$ )

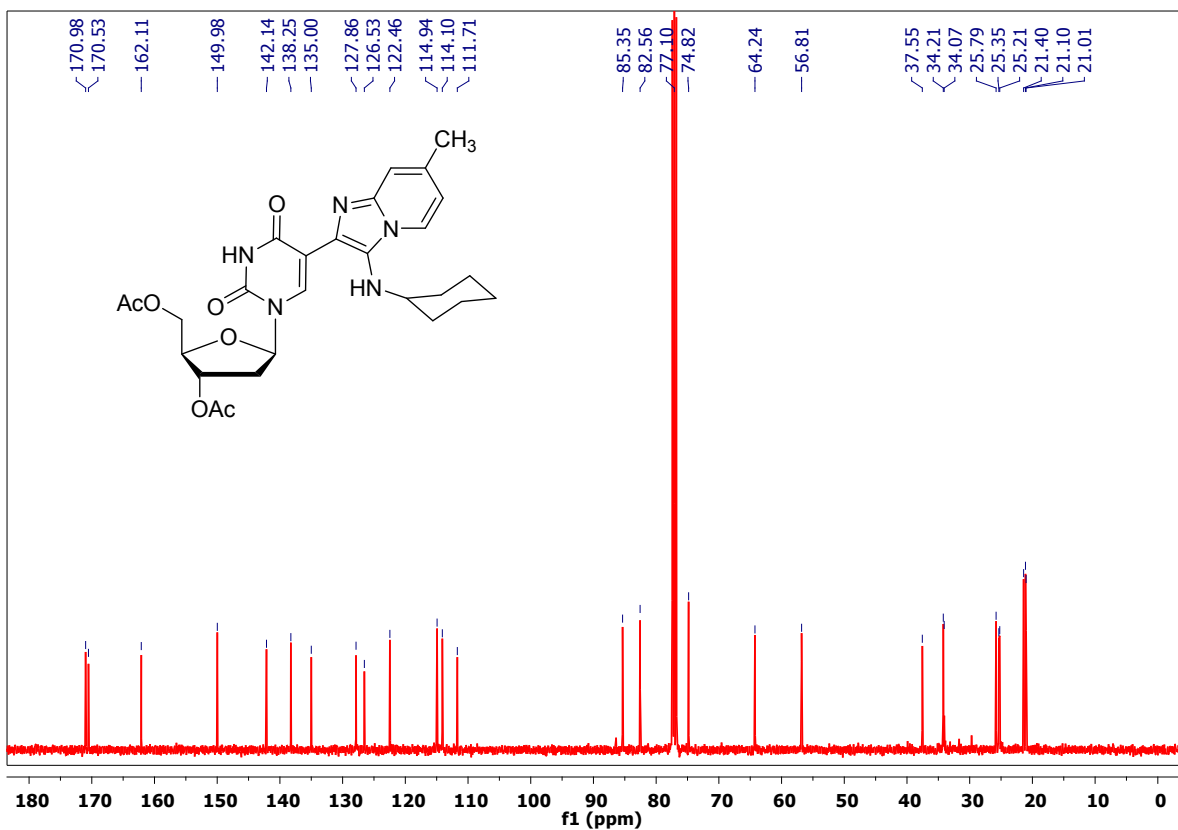

Figure 16:  $^{13}\text{C}$  NMR spectrum of compound 11h (100 MHz,  $\text{CDCl}_3$ )

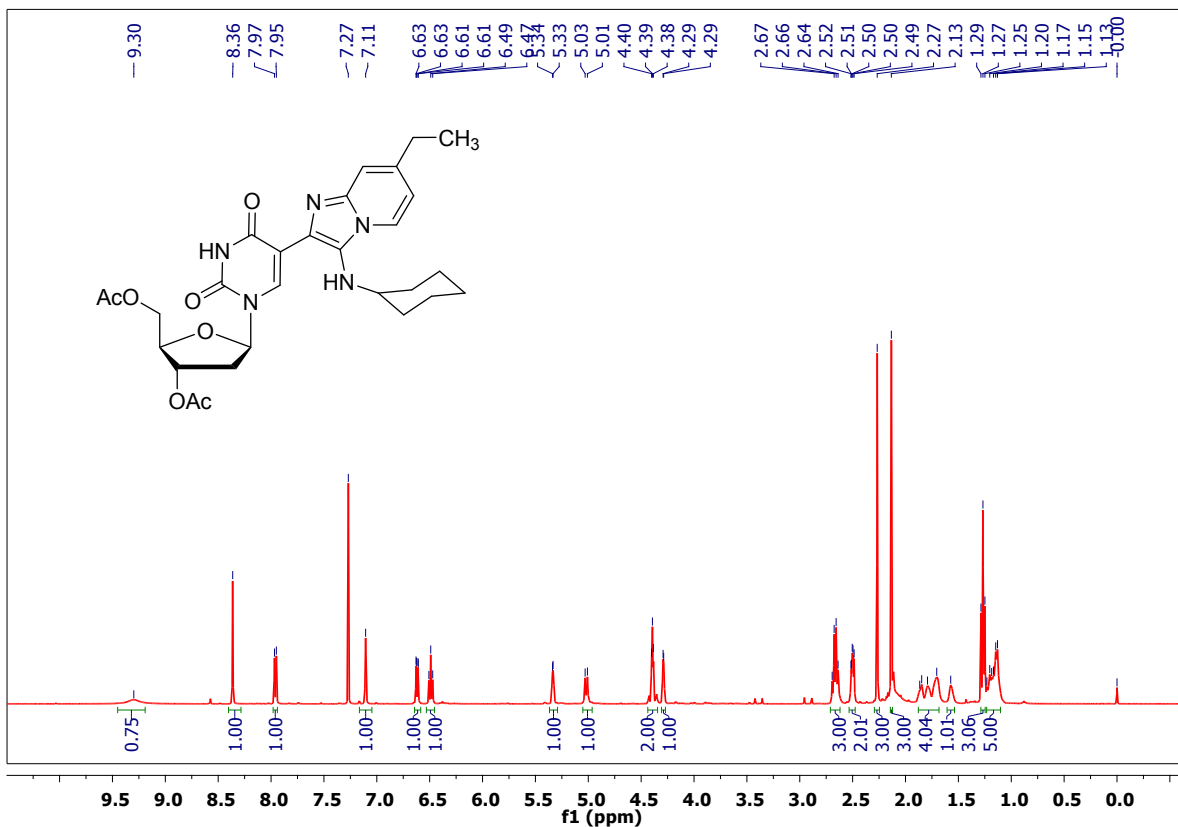

**Figure 17:**  $^1\text{H}$  NMR spectrum of compound **11i** (400 MHz,  $\text{CDCl}_3$ )

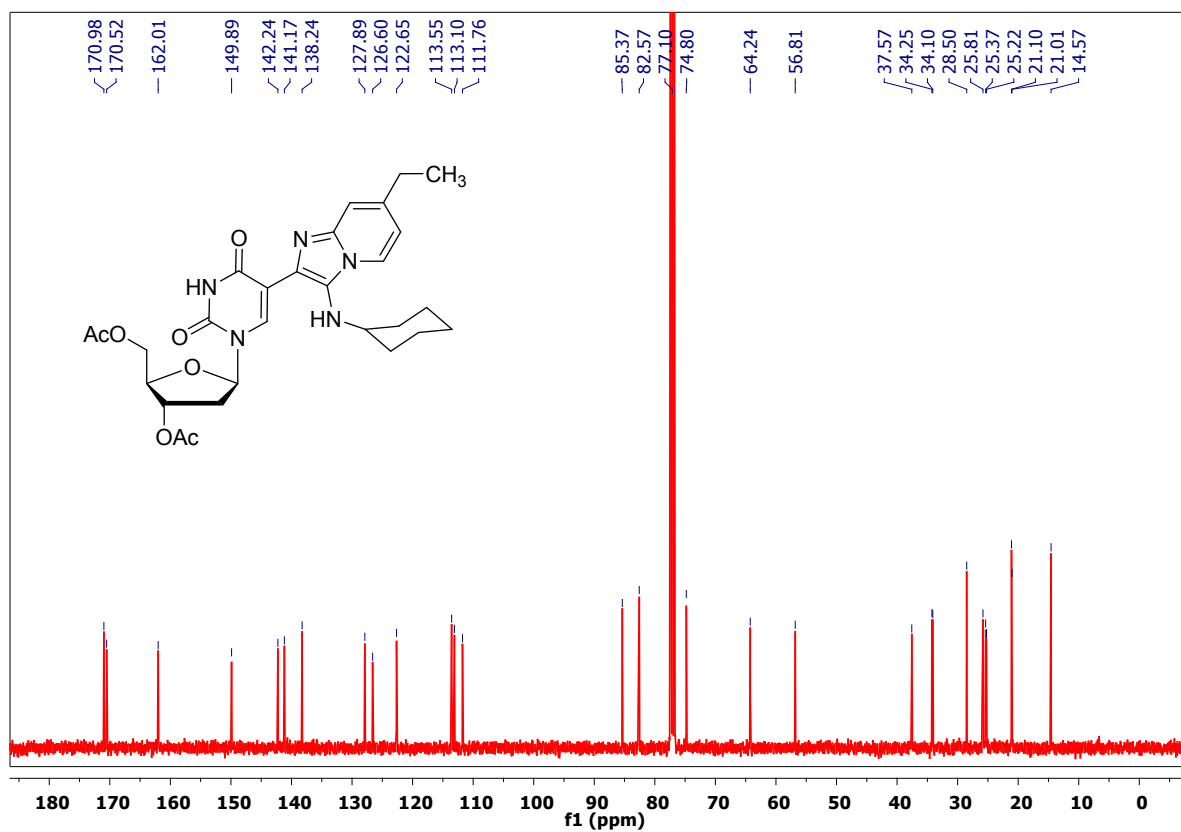

**Figure 18:**  $^{13}\text{C}$  NMR spectrum of compound **11i** (100 MHz,  $\text{CDCl}_3$ )

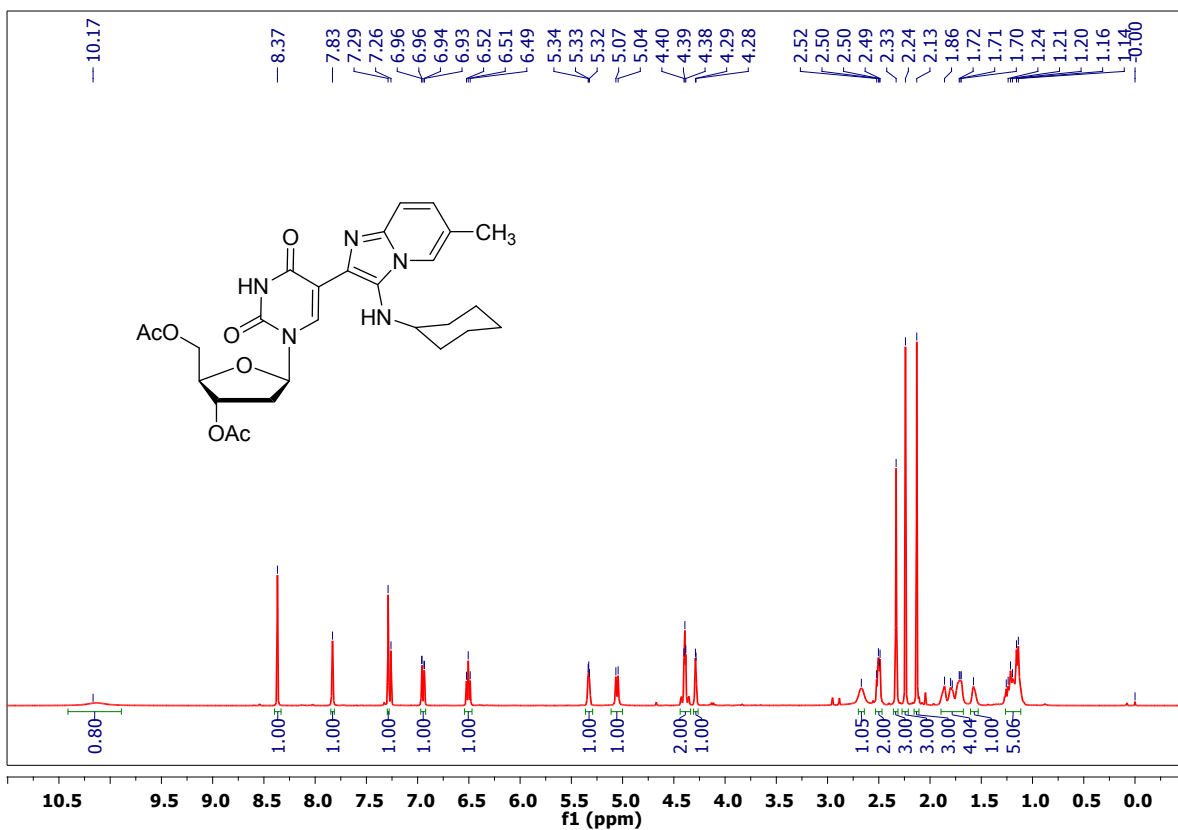

Figure 19: <sup>1</sup>H NMR spectrum of compound 11j (400 MHz, CDCl<sub>3</sub>)

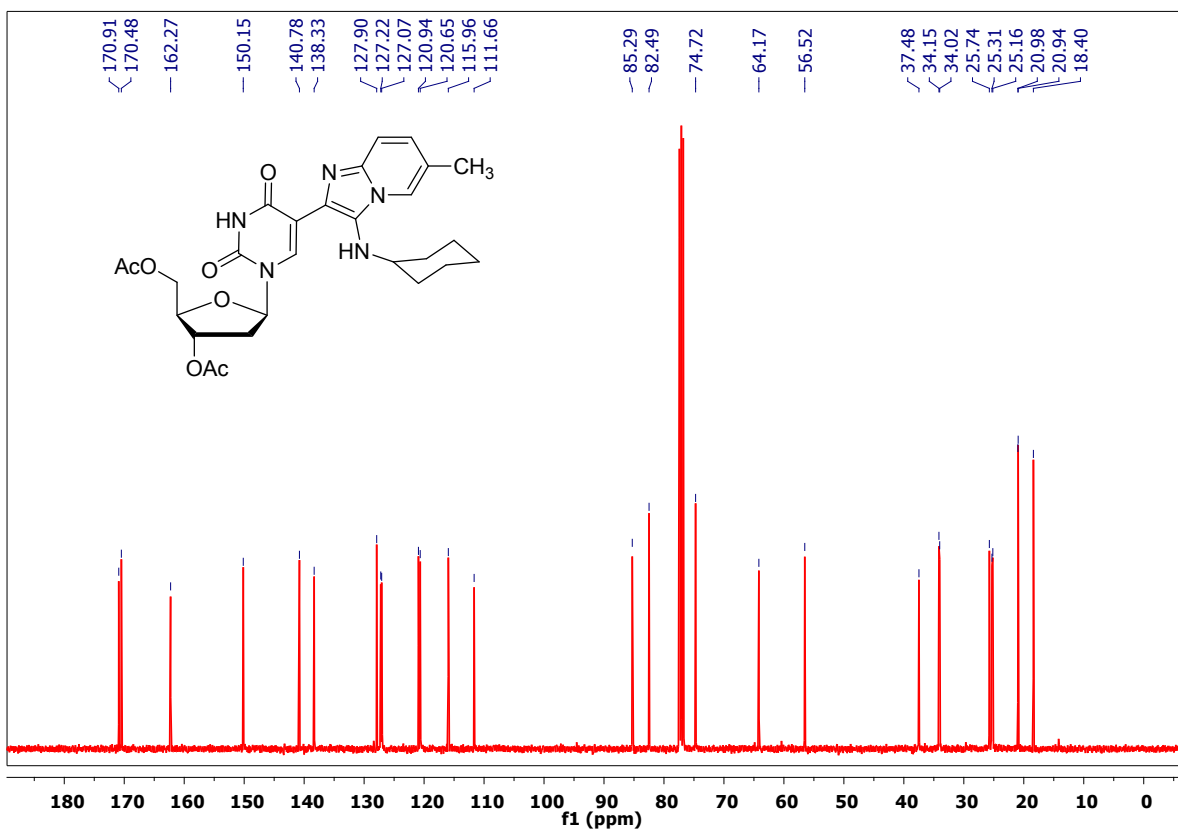

**Figure 20:**  $^{13}\text{C}$  NMR spectrum of compound **11j** (100 MHz,  $\text{CDCl}_3$ )

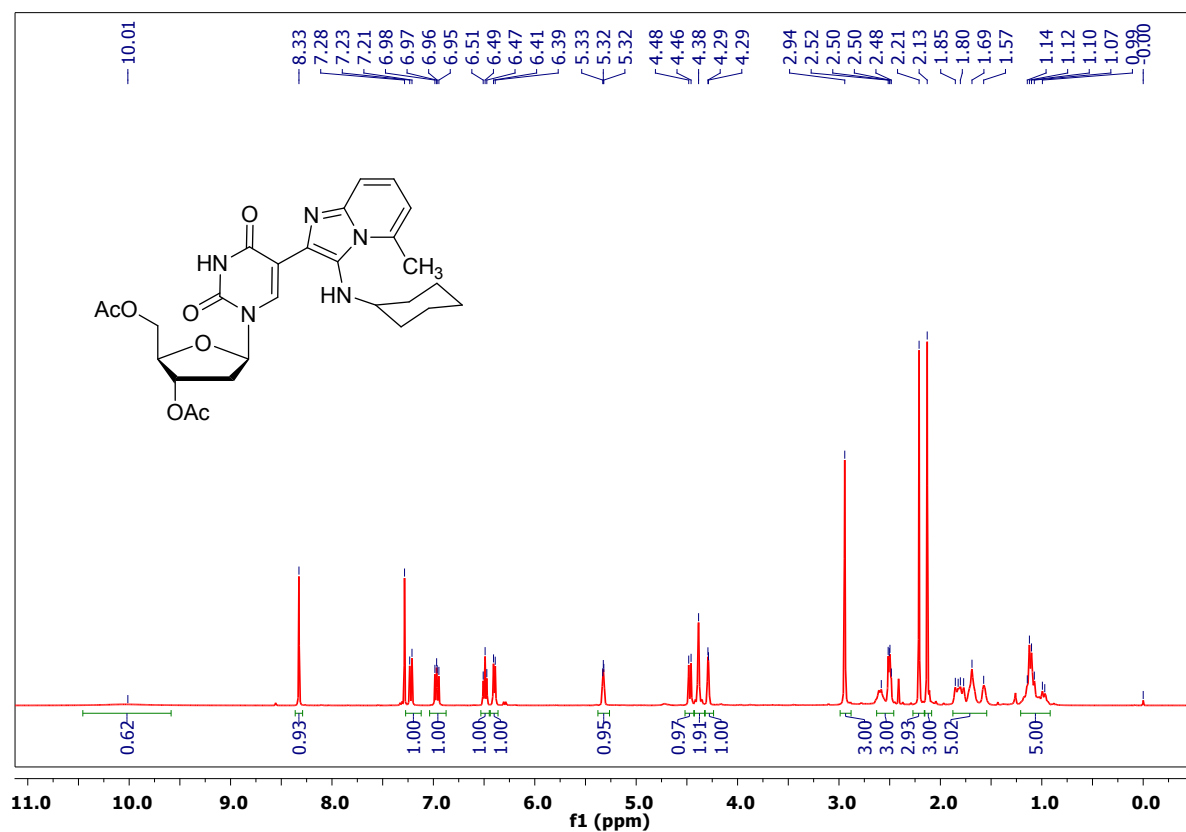

**Figure 21:**  $^1\text{H}$  NMR spectrum of compound **11k** (400 MHz,  $\text{CDCl}_3$ )



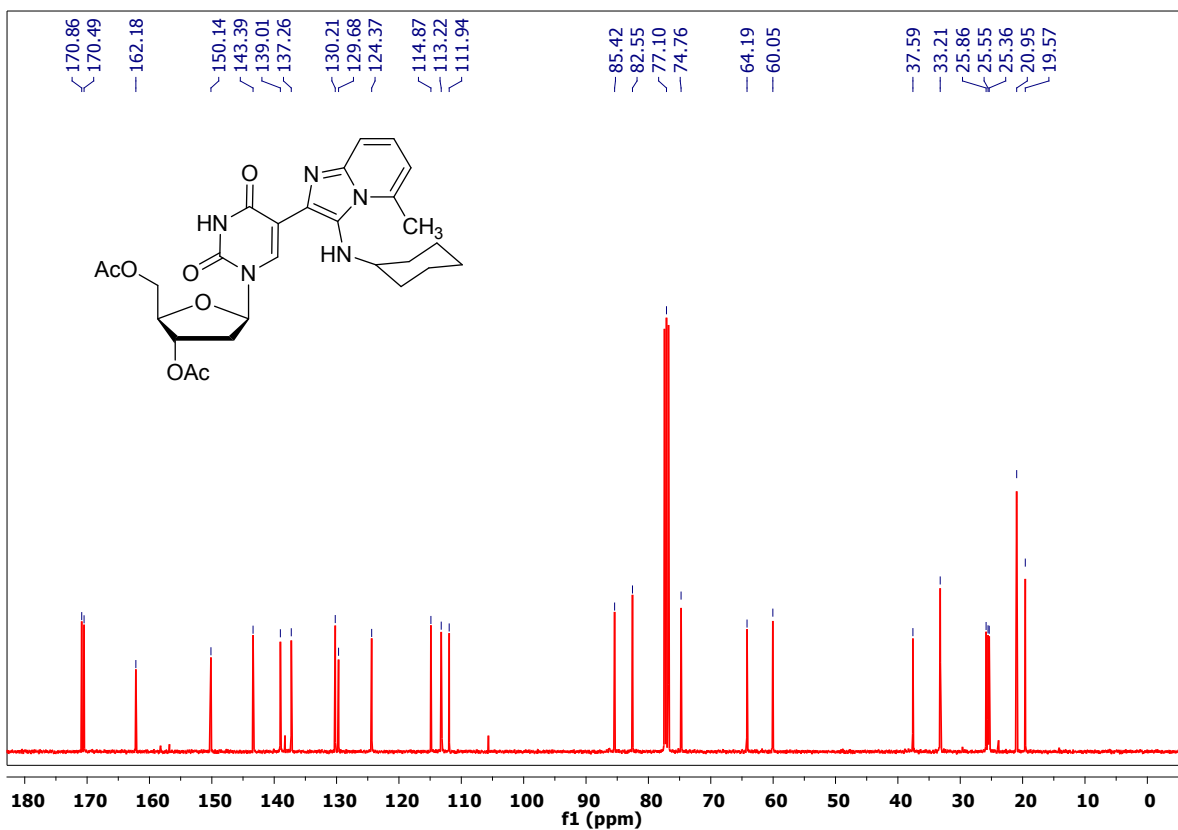

Figure 22: <sup>13</sup>C NMR spectrum of compound 11k (100 MHz, CDCl<sub>3</sub>)

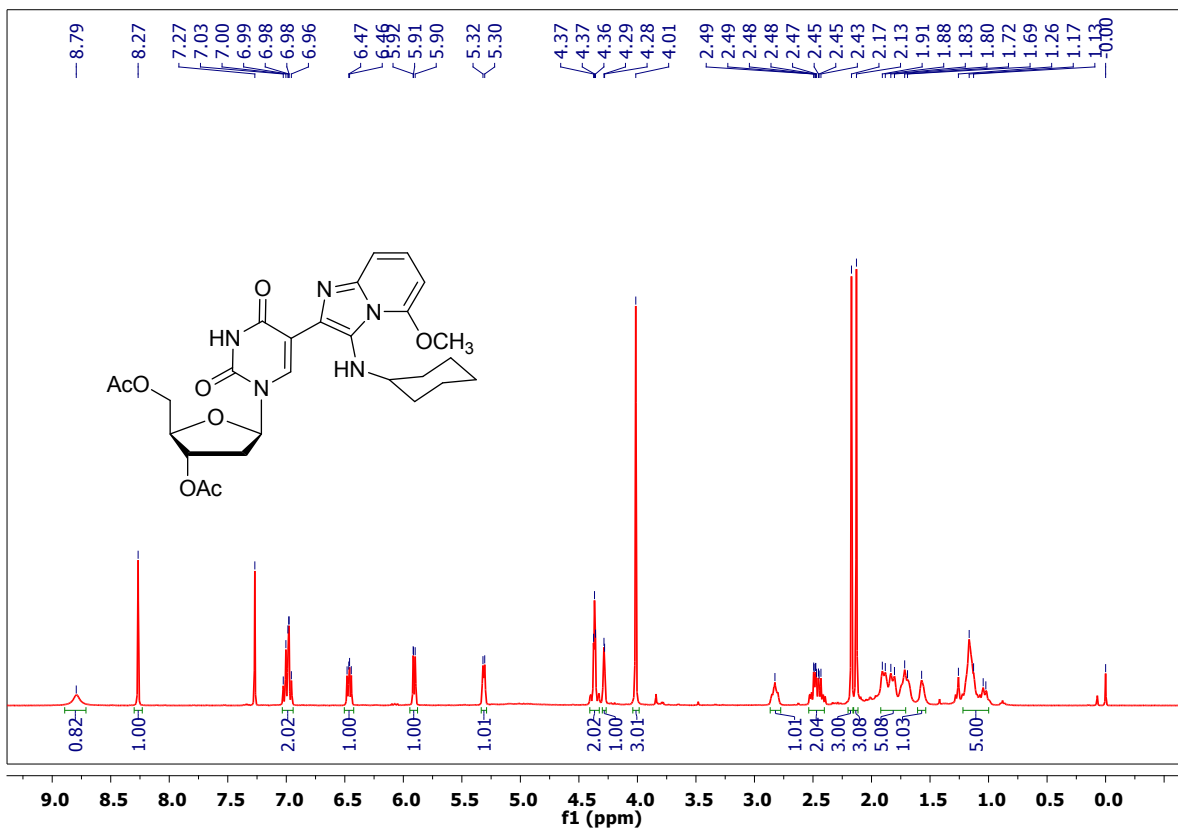

**Figure 23:**  $^1\text{H}$  NMR spectrum of compound **111** (400 MHz,  $\text{CDCl}_3$ )

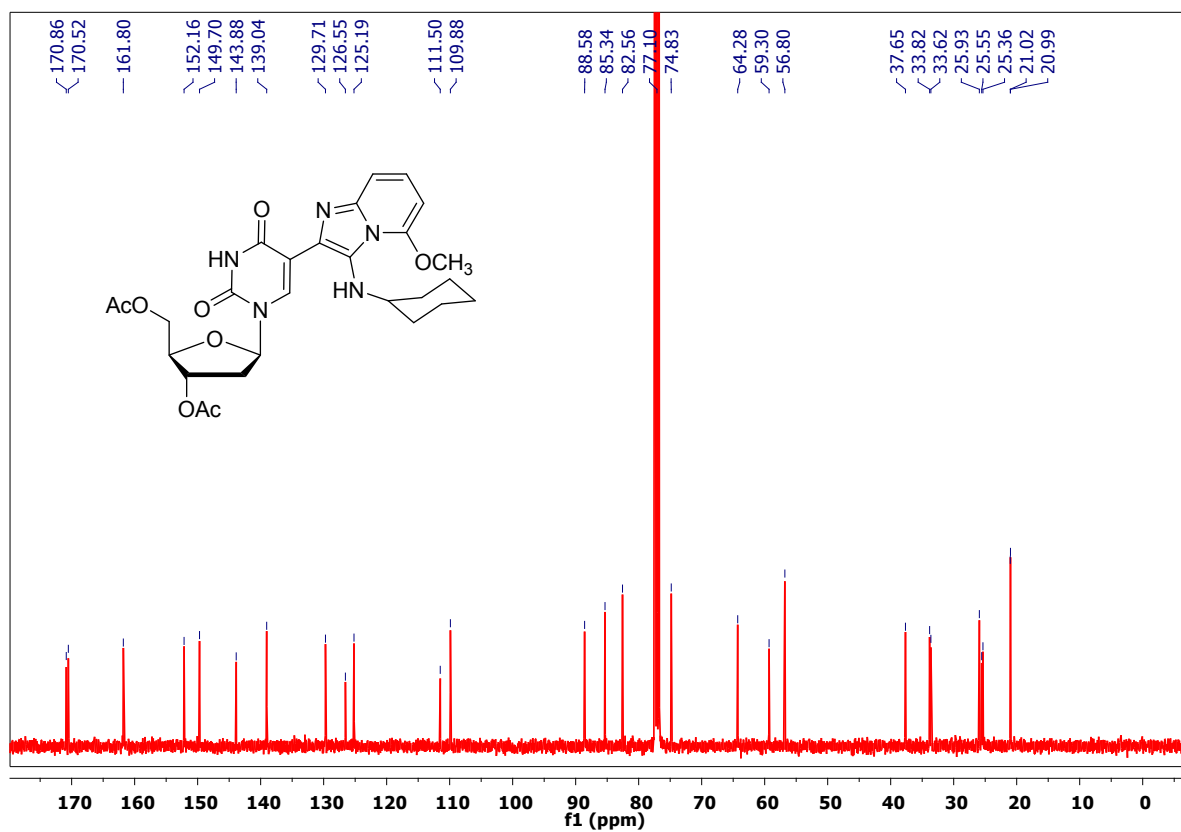

**Figure 24:**  $^{13}\text{C}$  NMR spectrum of compound **111** (100 MHz,  $\text{CDCl}_3$ )

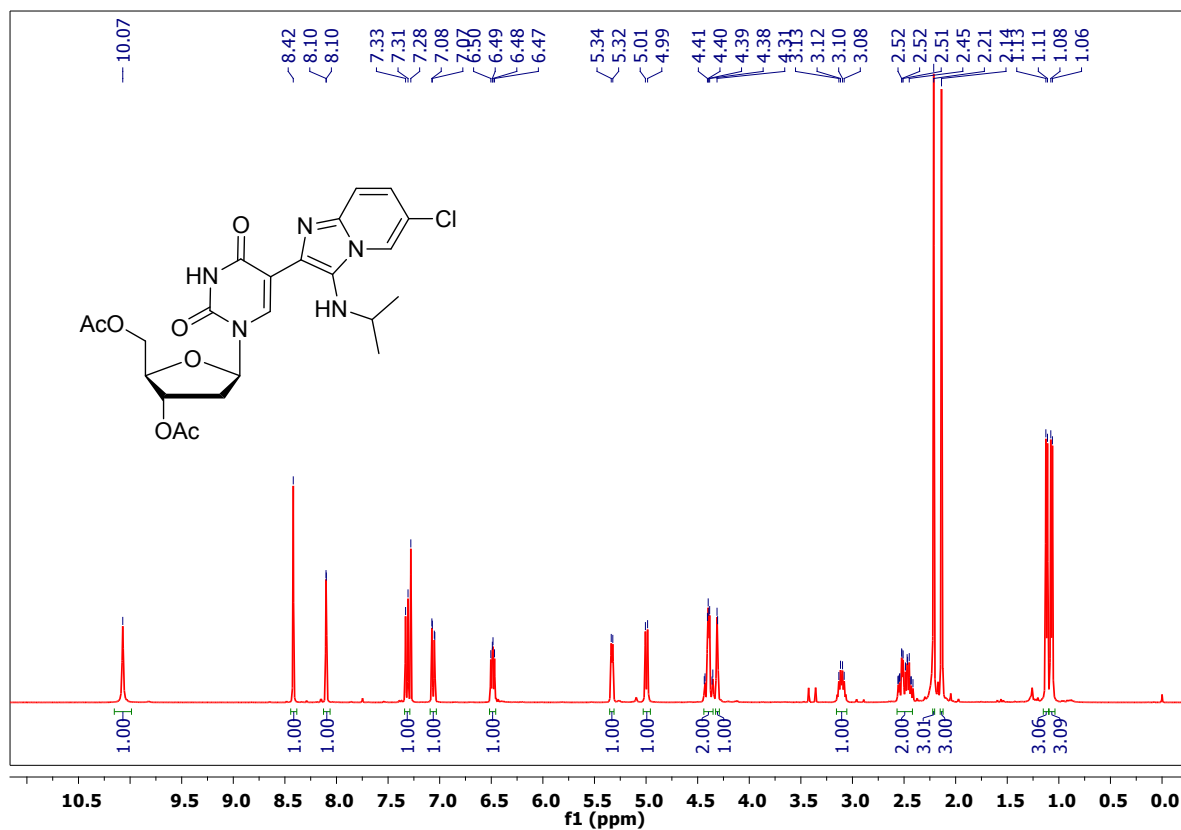

Figure 25: <sup>1</sup>H NMR spectrum of compound **11m** (400 MHz, CDCl<sub>3</sub>)

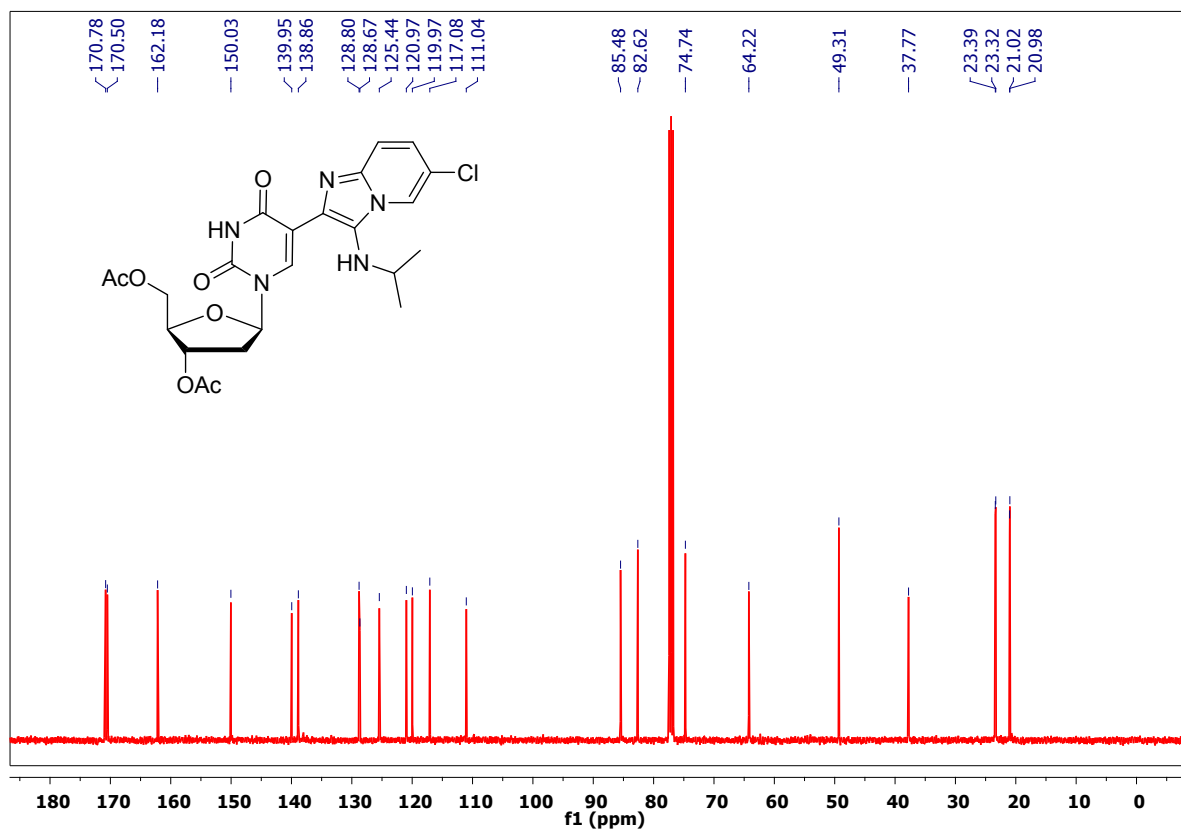

**Figure 26:**  $^{13}\text{C}$  NMR spectrum of compound **11m** (100 MHz,  $\text{CDCl}_3$ )

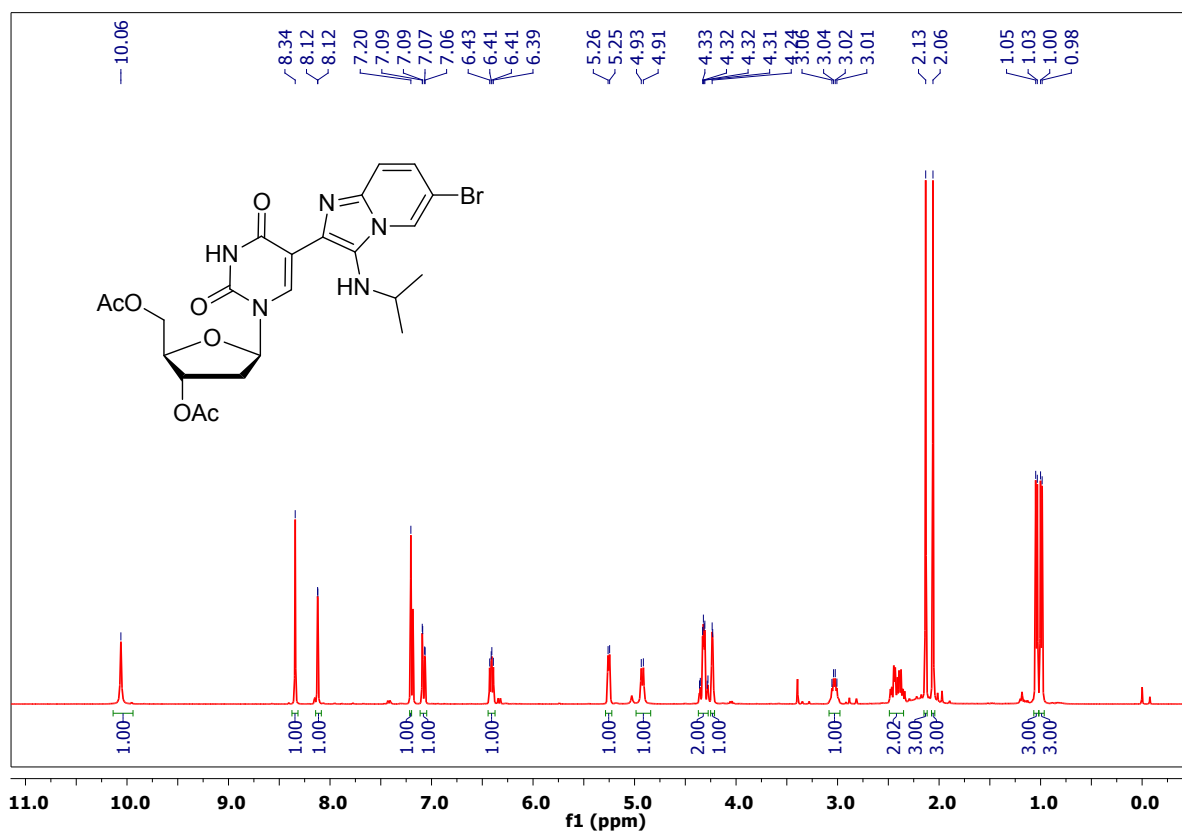

**Figure 27:**  $^1\text{H}$  NMR spectrum of compound **11n** (400 MHz,  $\text{CDCl}_3$ )

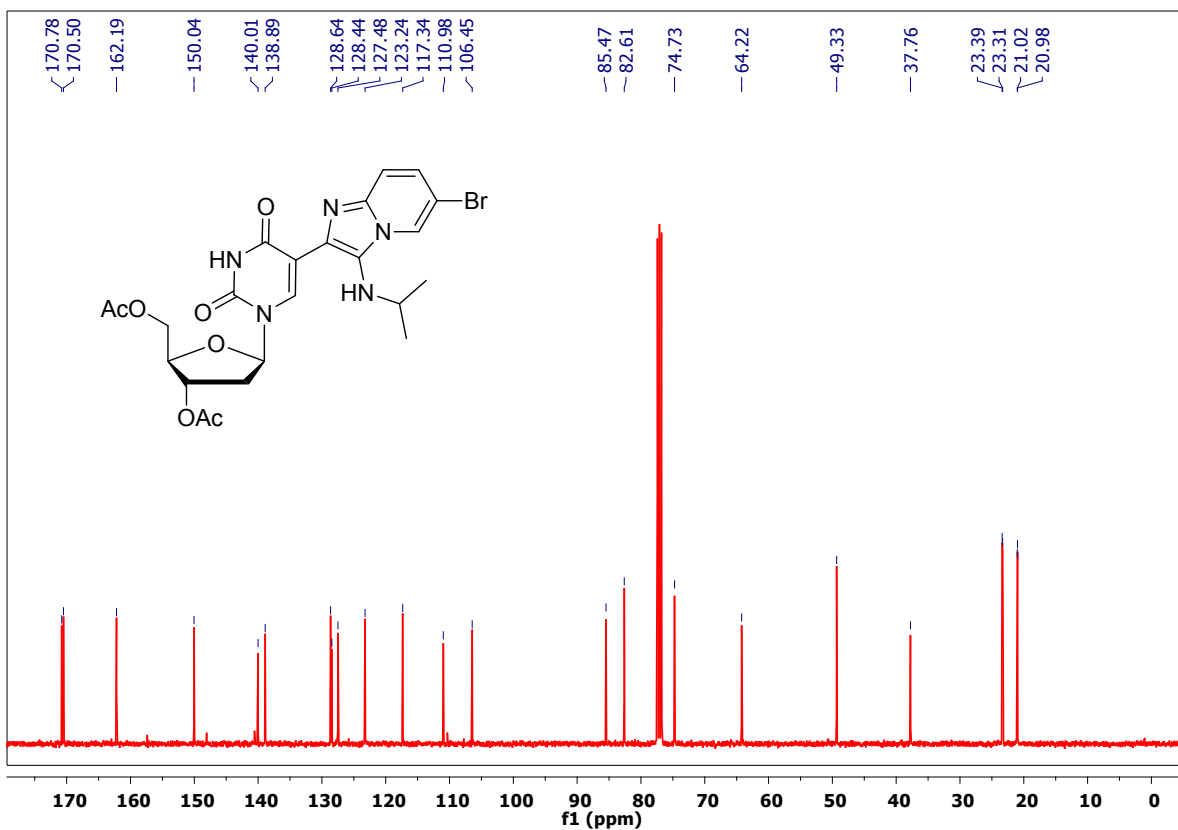

Figure 28: <sup>13</sup>C NMR spectrum of compound 11n (100 MHz, CDCl<sub>3</sub>)

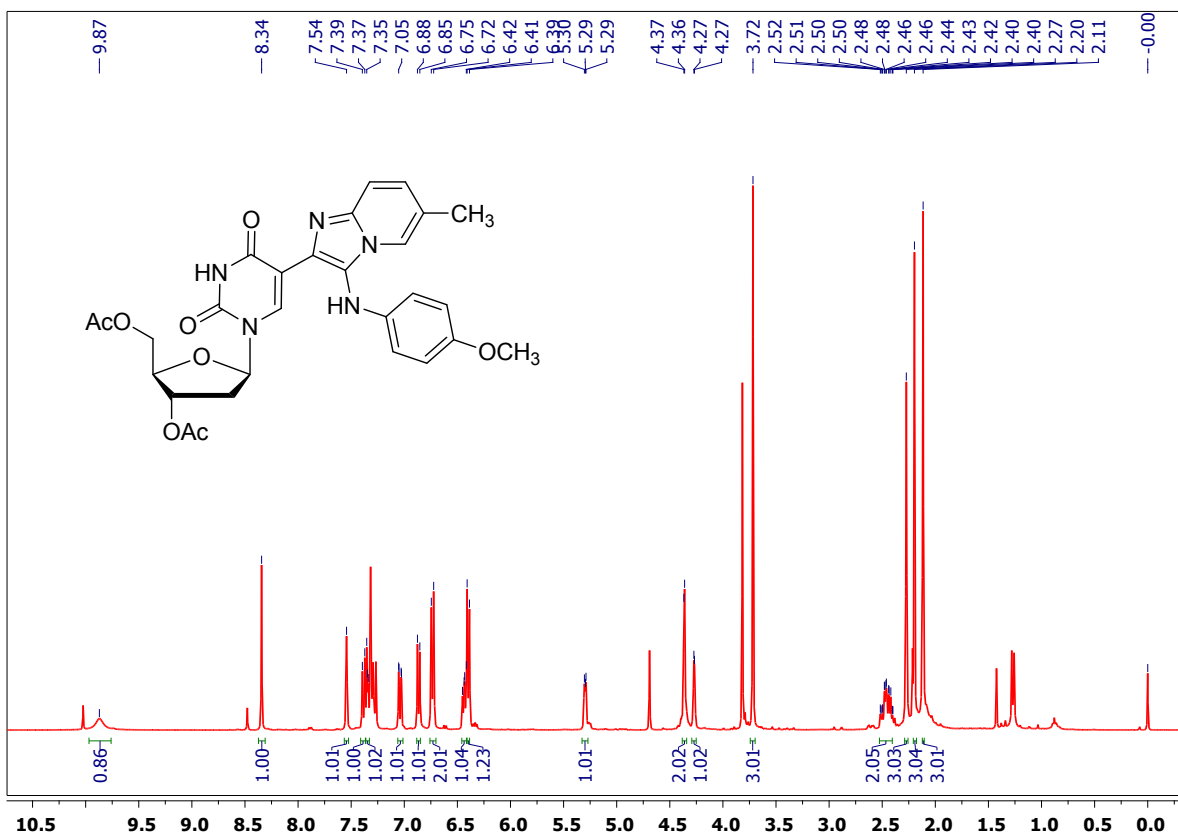





**Figure 30:**  $^{13}\text{C}$  NMR spectrum of compound **5a** (100 MHz,  $\text{DMSO-}d_6$ )

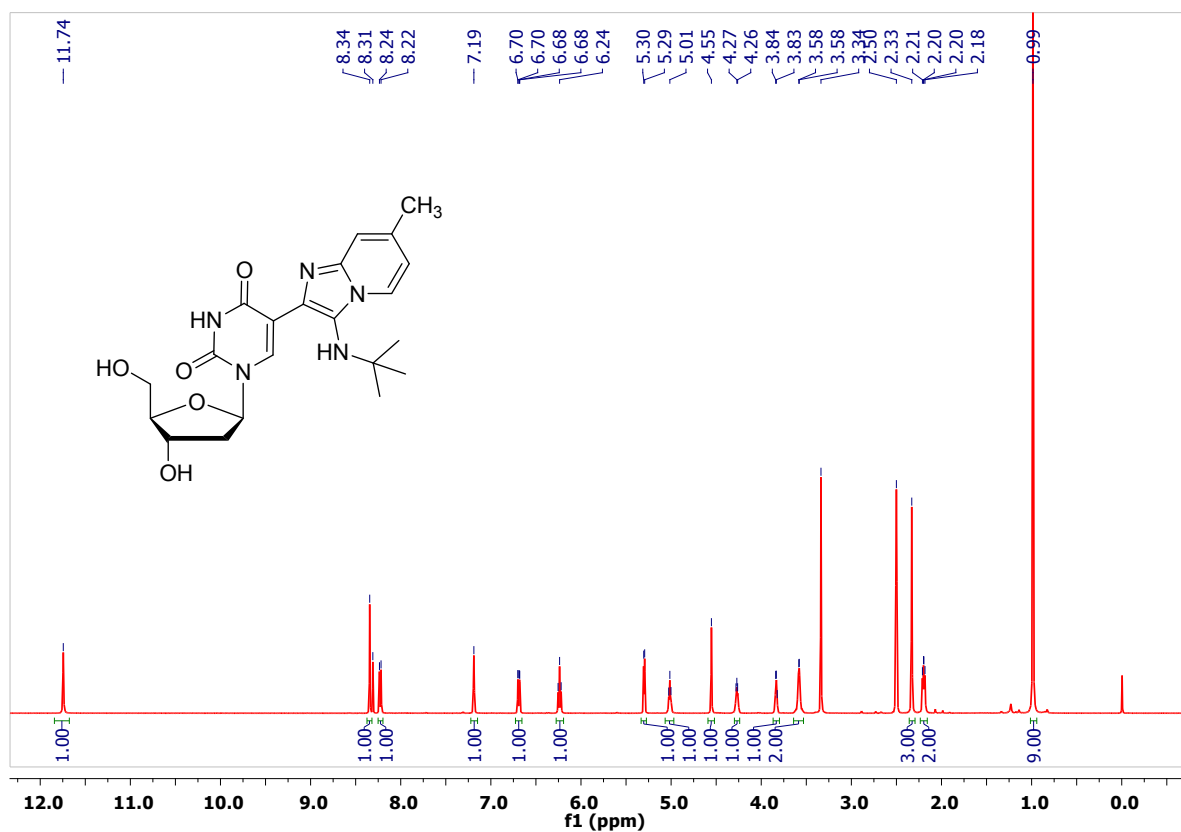

**Figure 31:**  $^1\text{H}$  NMR spectrum of compound **5b** (400 MHz,  $\text{DMSO-}d_6$ )



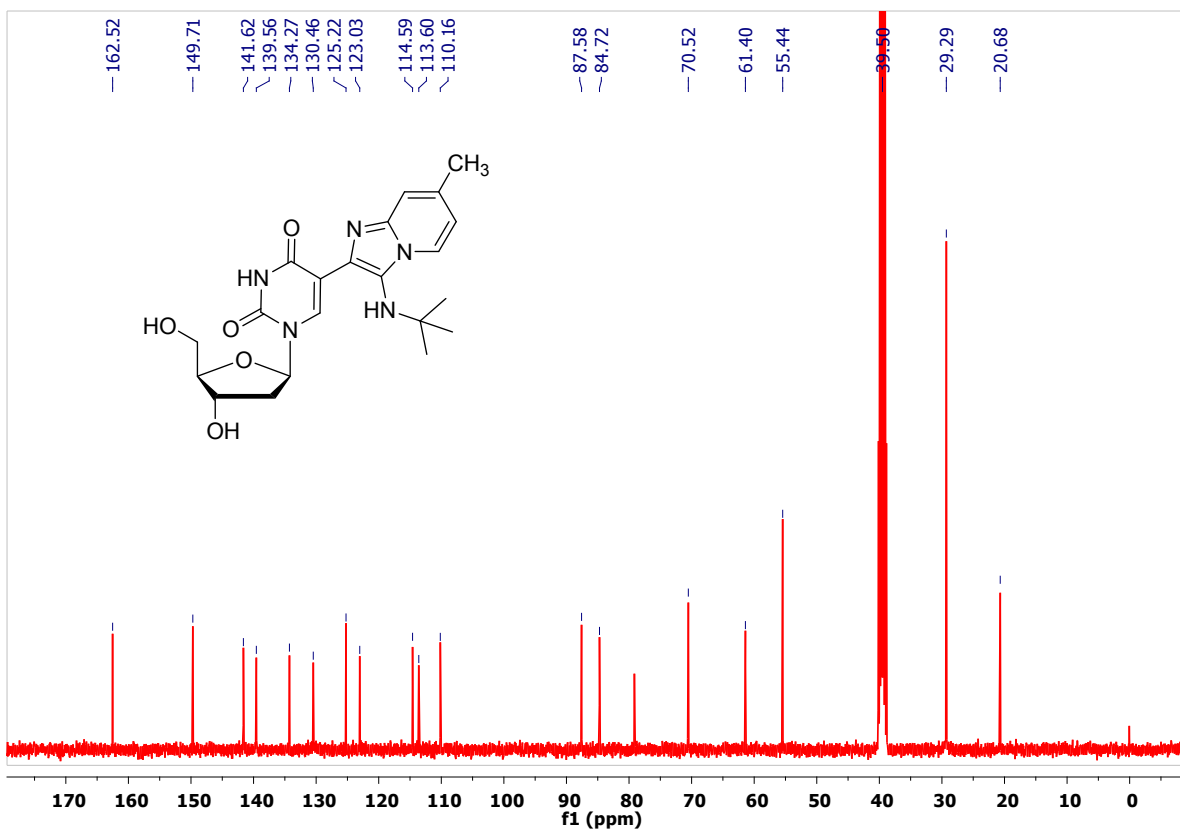

Figure 32: <sup>13</sup>C NMR spectrum of compound 5b (100 MHz, DMSO-d<sub>6</sub>)

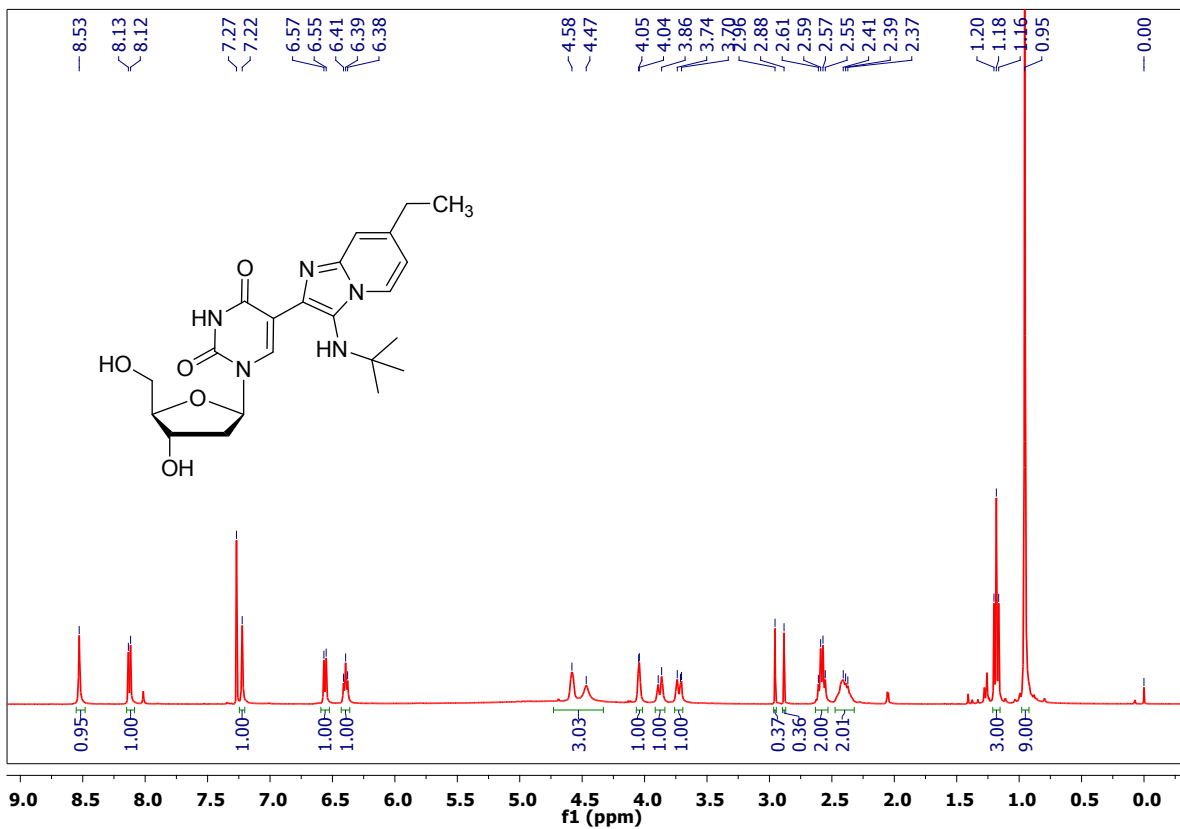

**Figure 33:**  $^1\text{H}$  NMR spectrum of compound **5c** (400 MHz,  $\text{CDCl}_3$ )

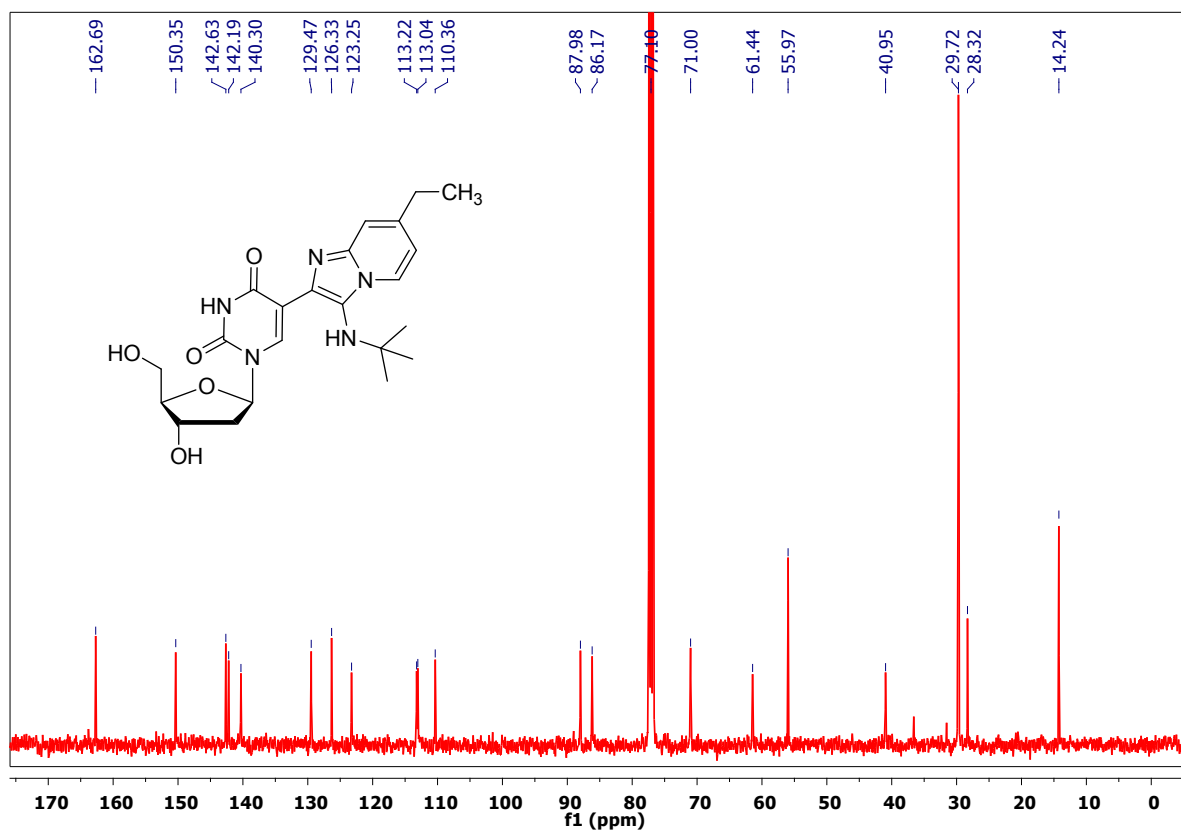

**Figure 34:**  $^{13}\text{C}$  NMR spectrum of compound **5c** (100 MHz,  $\text{CDCl}_3$ )

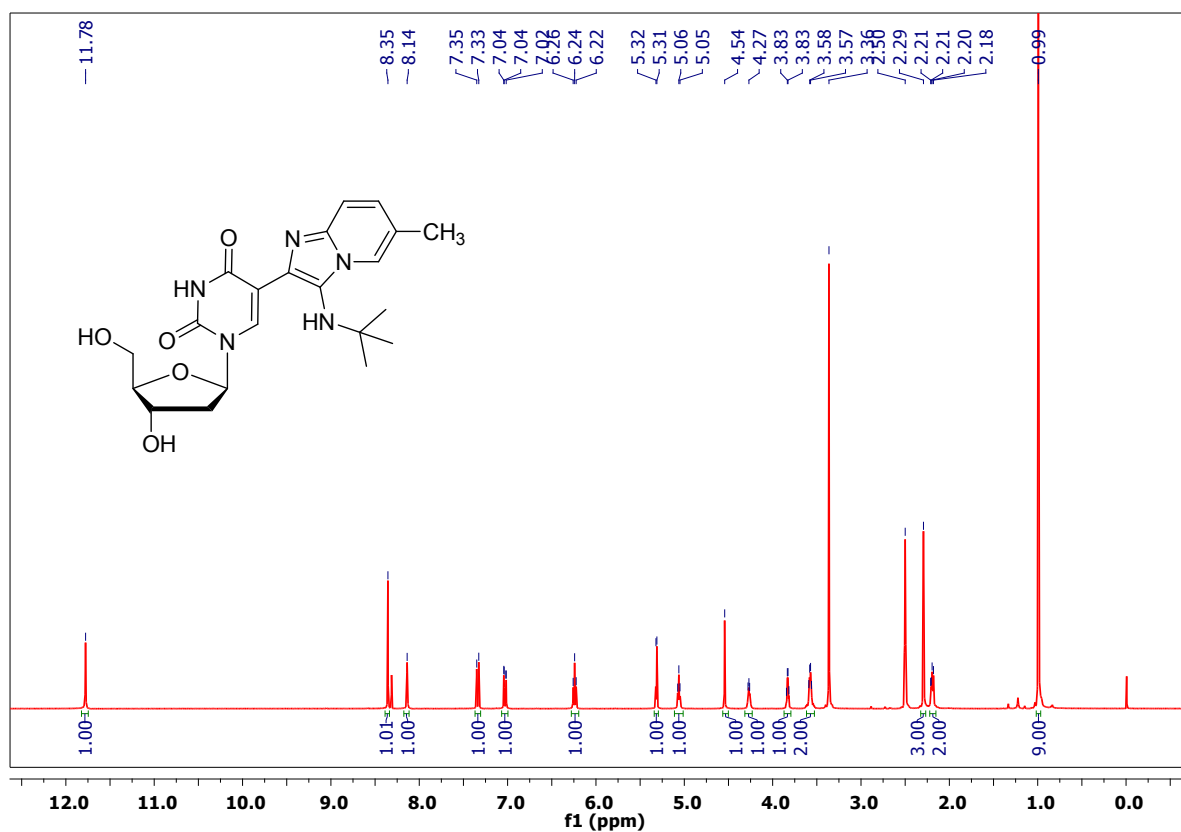

**Figure 35:** <sup>1</sup>H NMR spectrum of compound **5d** (400 MHz, DMSO-*d*<sub>6</sub>)

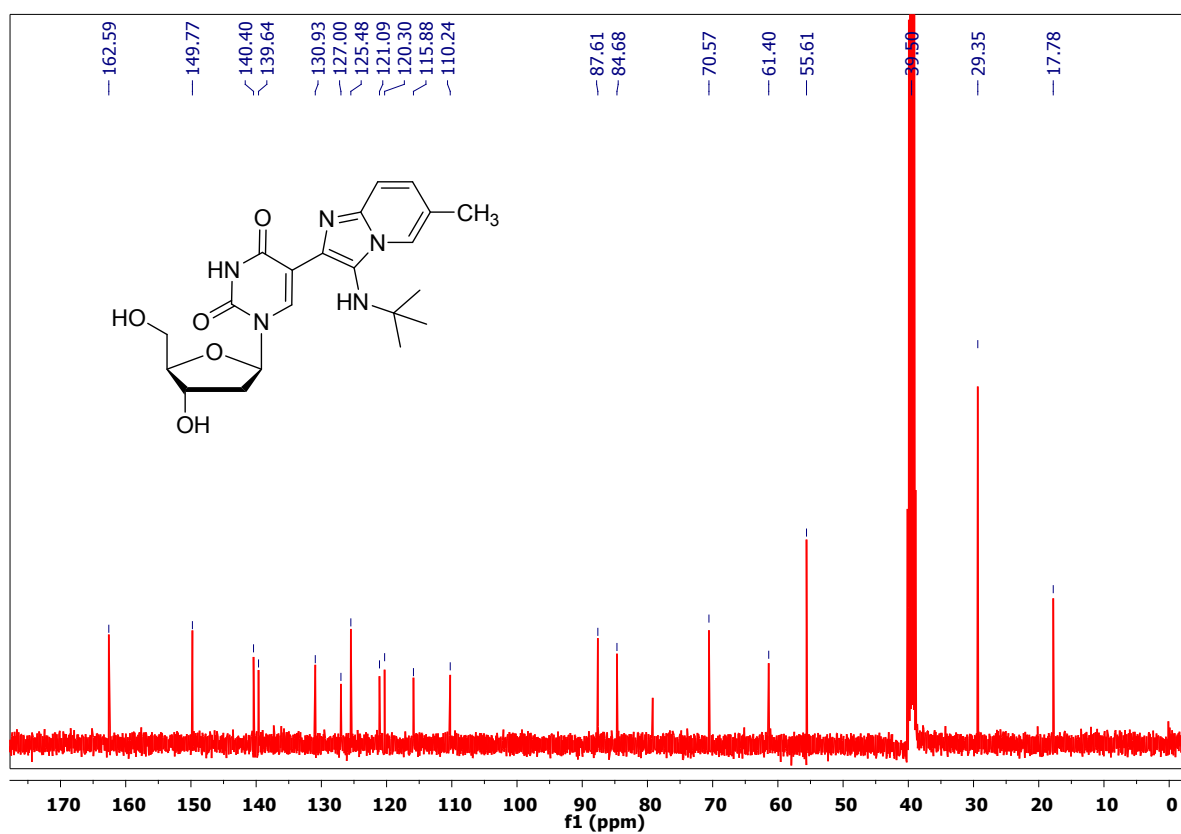

**Figure 36:**  $^{13}\text{C}$  NMR spectrum of compound **5d** (100 MHz,  $\text{DMSO}-d_6$ )

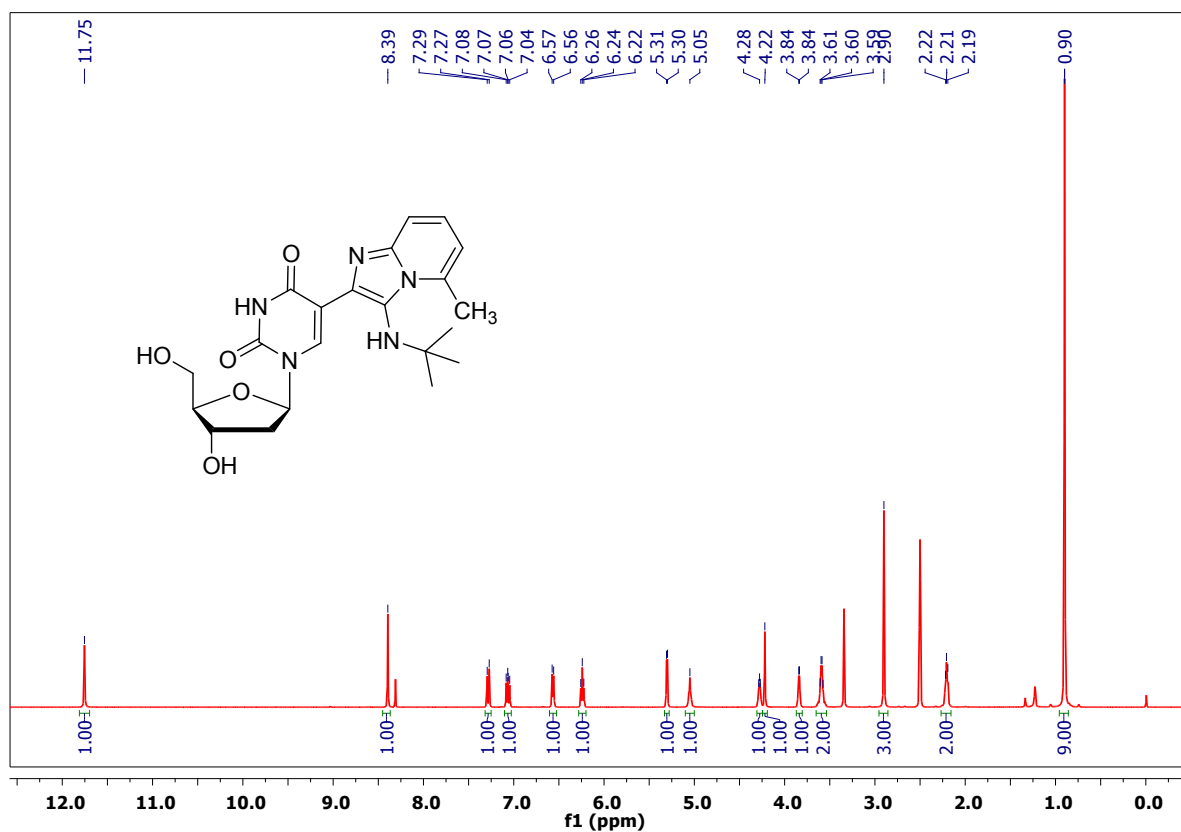

**Figure 37:**  $^1\text{H}$  NMR spectrum of compound **5e** (400 MHz,  $\text{DMSO}-d_6$ )

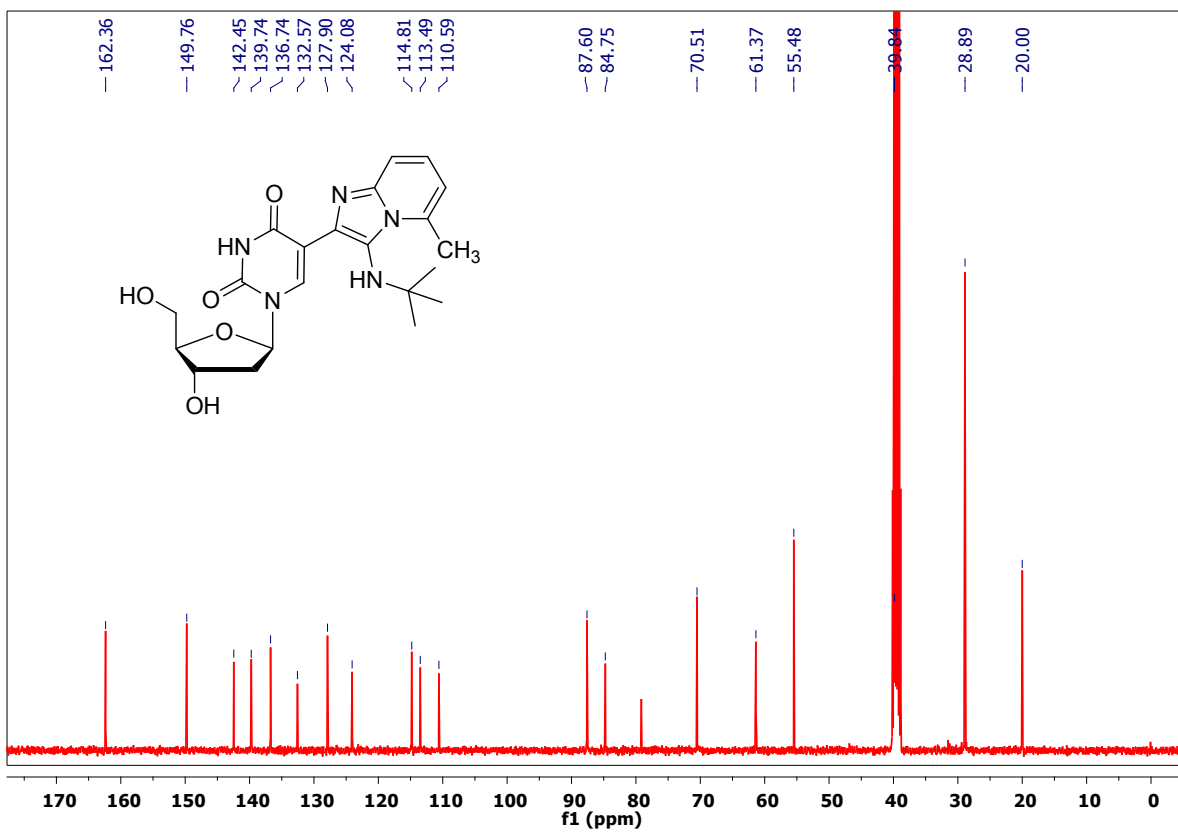

Figure 38:  $^{13}\text{C}$  NMR spectrum of compound 5e (100 MHz,  $\text{DMSO-}d_6$ )

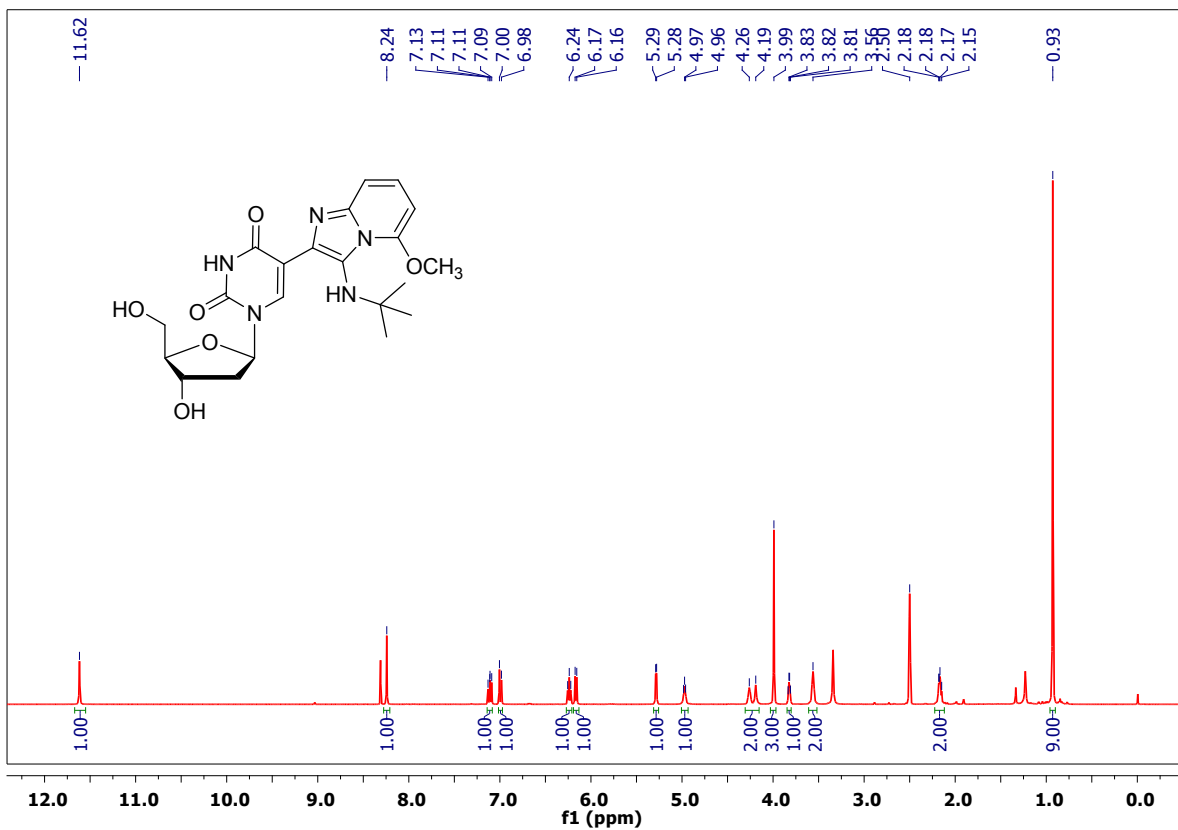

**Figure 39:**  $^1\text{H}$  NMR spectrum of compound **5f** (400 MHz,  $\text{DMSO-}d_6$ )

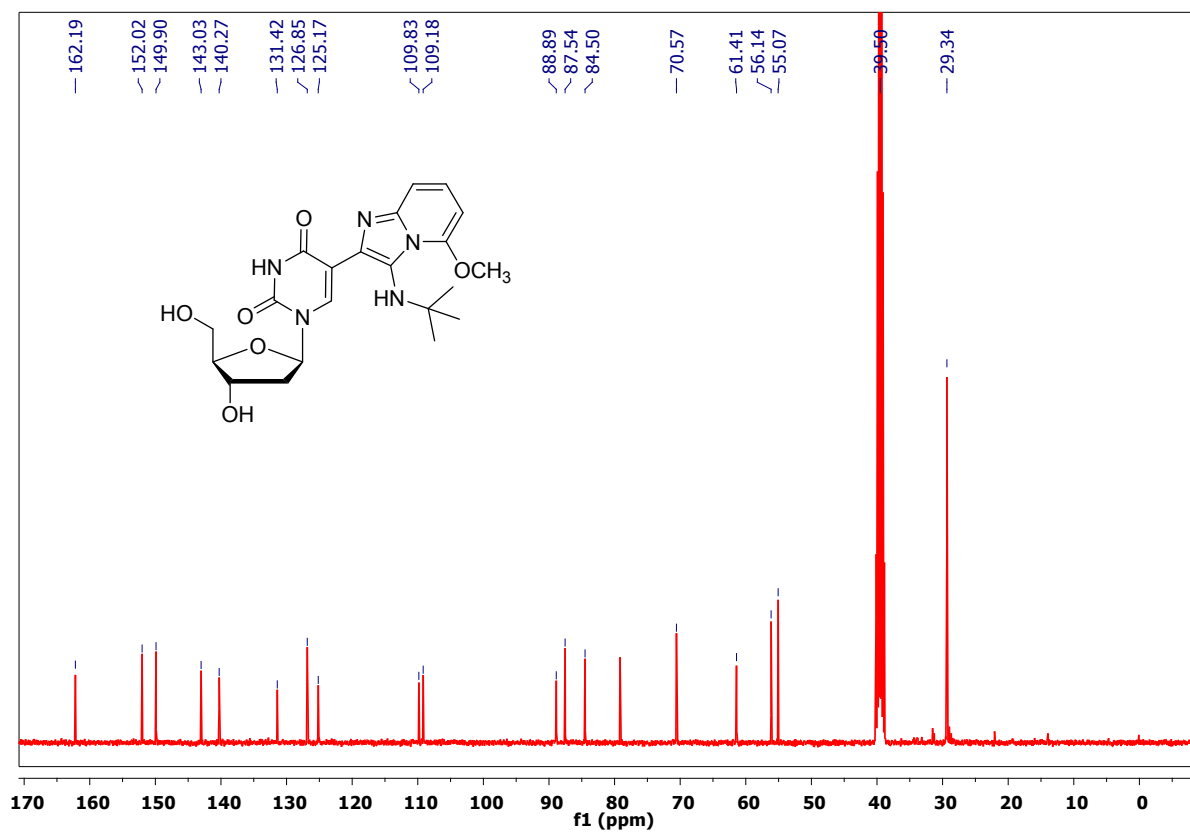

**Figure 40:**  $^{13}\text{C}$  NMR spectrum of compound **5f** (100 MHz,  $\text{DMSO-}d_6$ )

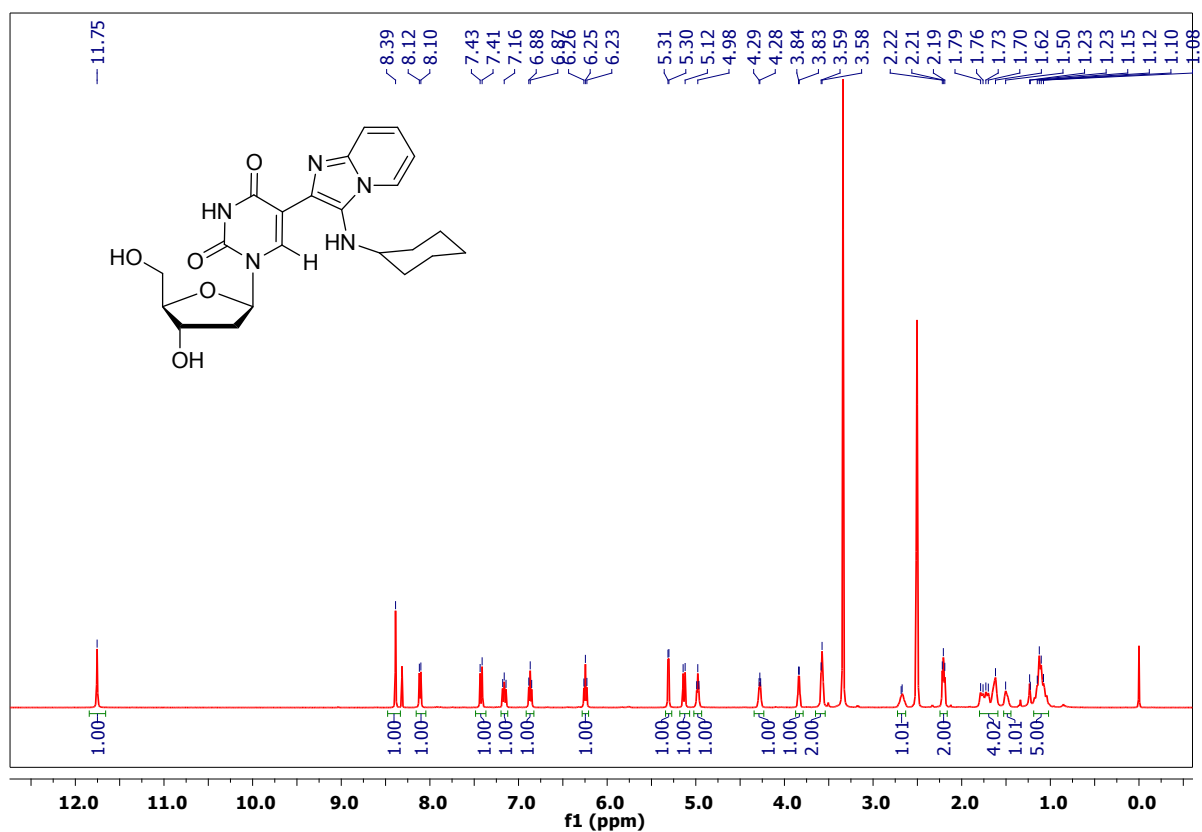

Figure 41:  $^1\text{H}$  NMR spectrum of compound **5g** (400 MHz,  $\text{DMSO-}d_6$ )

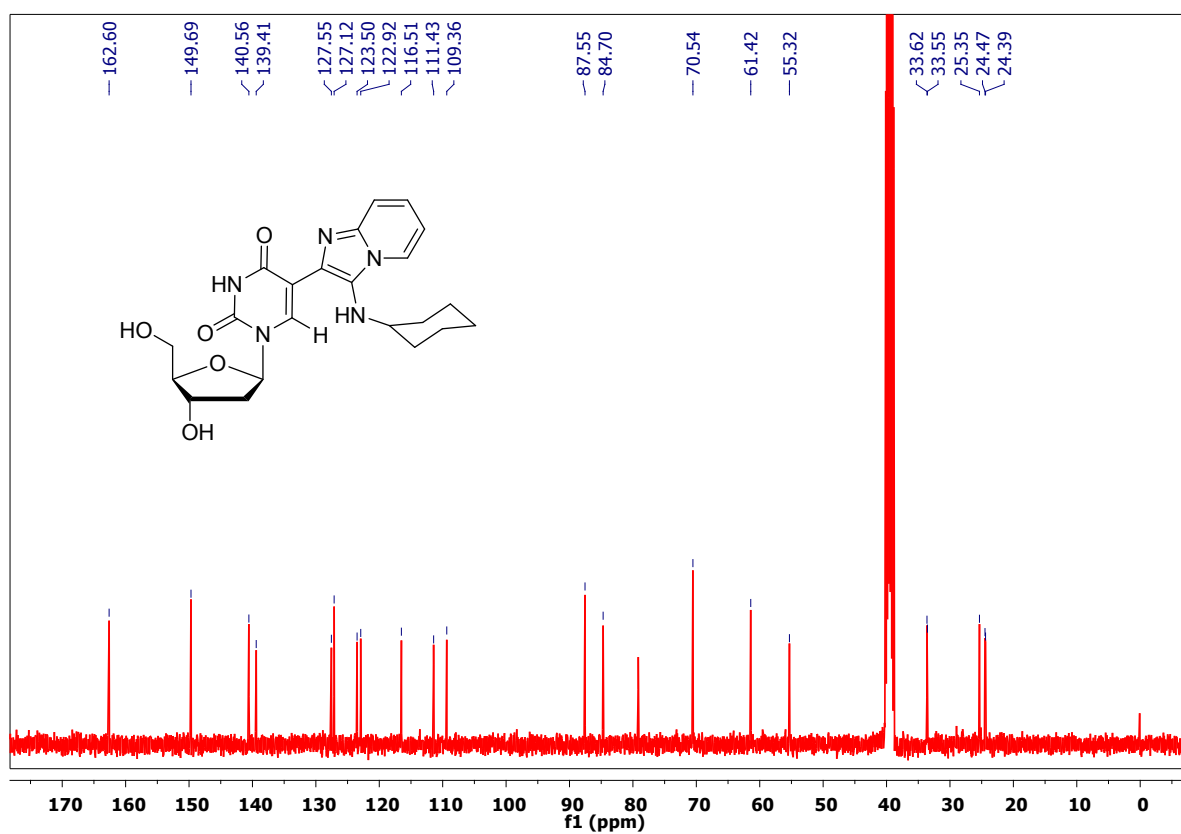

**Figure 42:**  $^{13}\text{C}$  NMR spectrum of compound **5g** (100 MHz,  $\text{DMSO-}d_6$ )

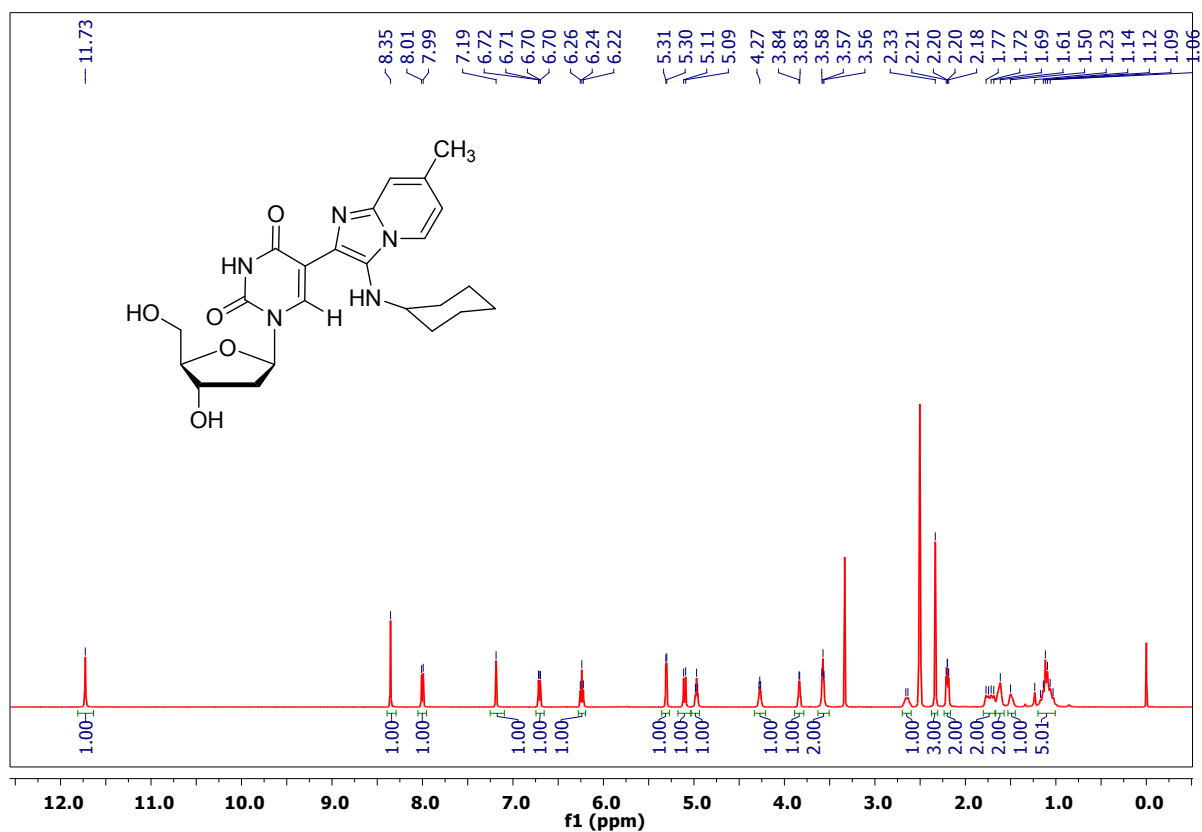

**Figure 43:**  $^1\text{H}$  NMR spectrum of compound **5h** (400 MHz,  $\text{DMSO-}d_6$ )



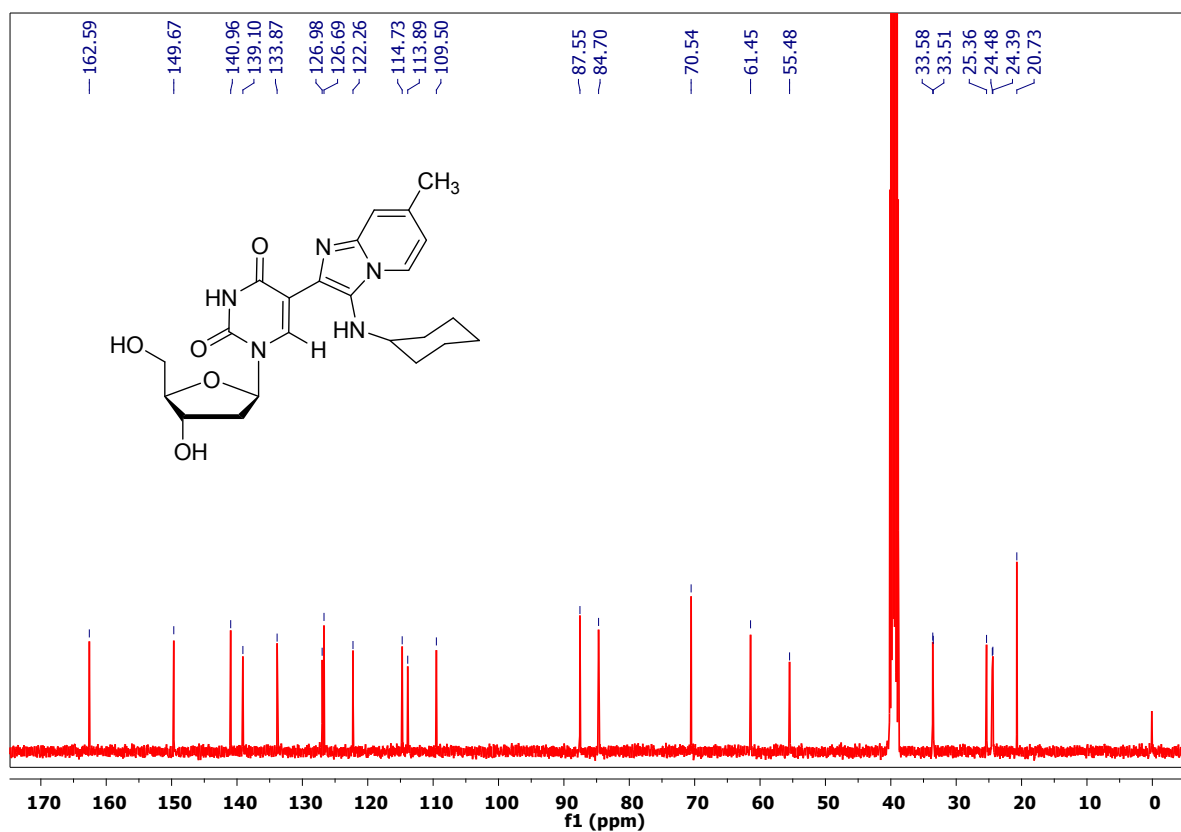

Figure 44:  $^{13}\text{C}$  NMR spectrum of compound **5h** (100 MHz,  $\text{DMSO-}d_6$ )

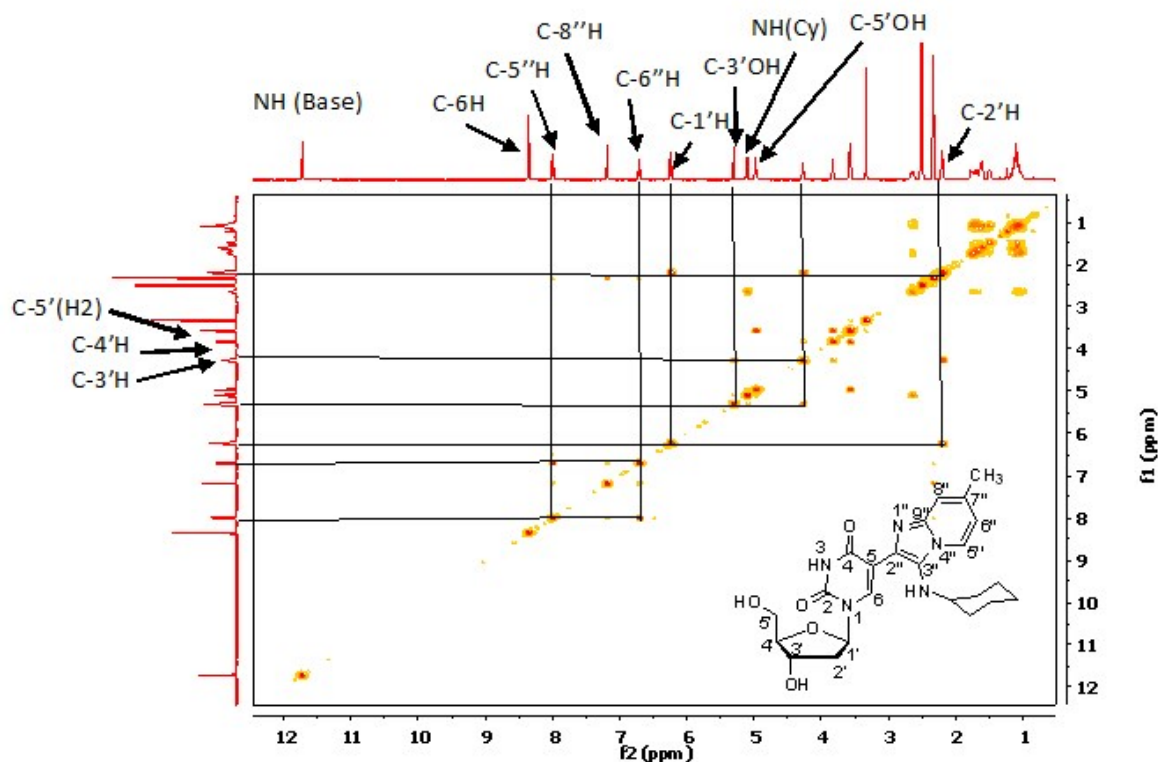

Figure 45:  $^1\text{H}$ - $^1\text{H}$  COSY NMR spectrum of compound **5h** (400 MHz,  $\text{DMSO-}d_6$ )



**Figure 47:**  $^1\text{H}$  NMR spectrum of compound **5i** (400 MHz,  $\text{DMSO-}d_6$ )

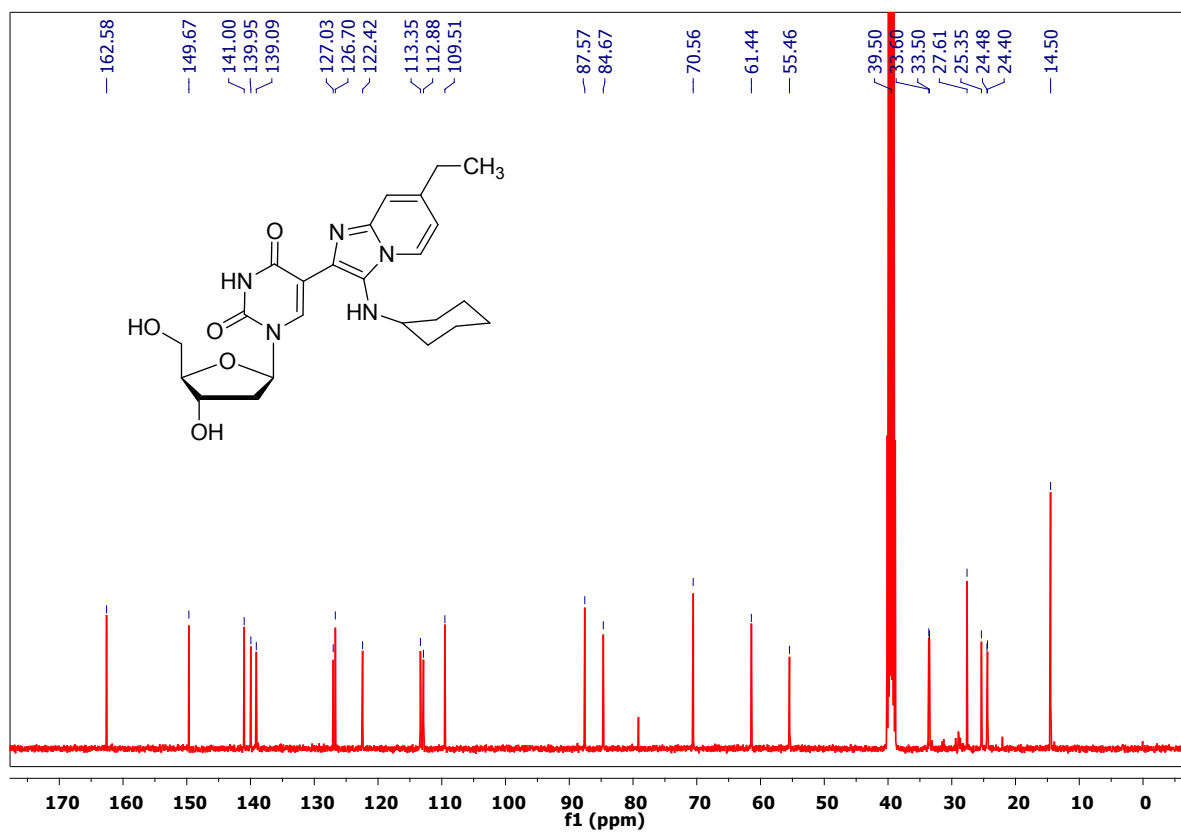

**Figure 48:**  $^{13}\text{C}$  NMR spectrum of compound **5i** (100 MHz,  $\text{DMSO-}d_6$ )

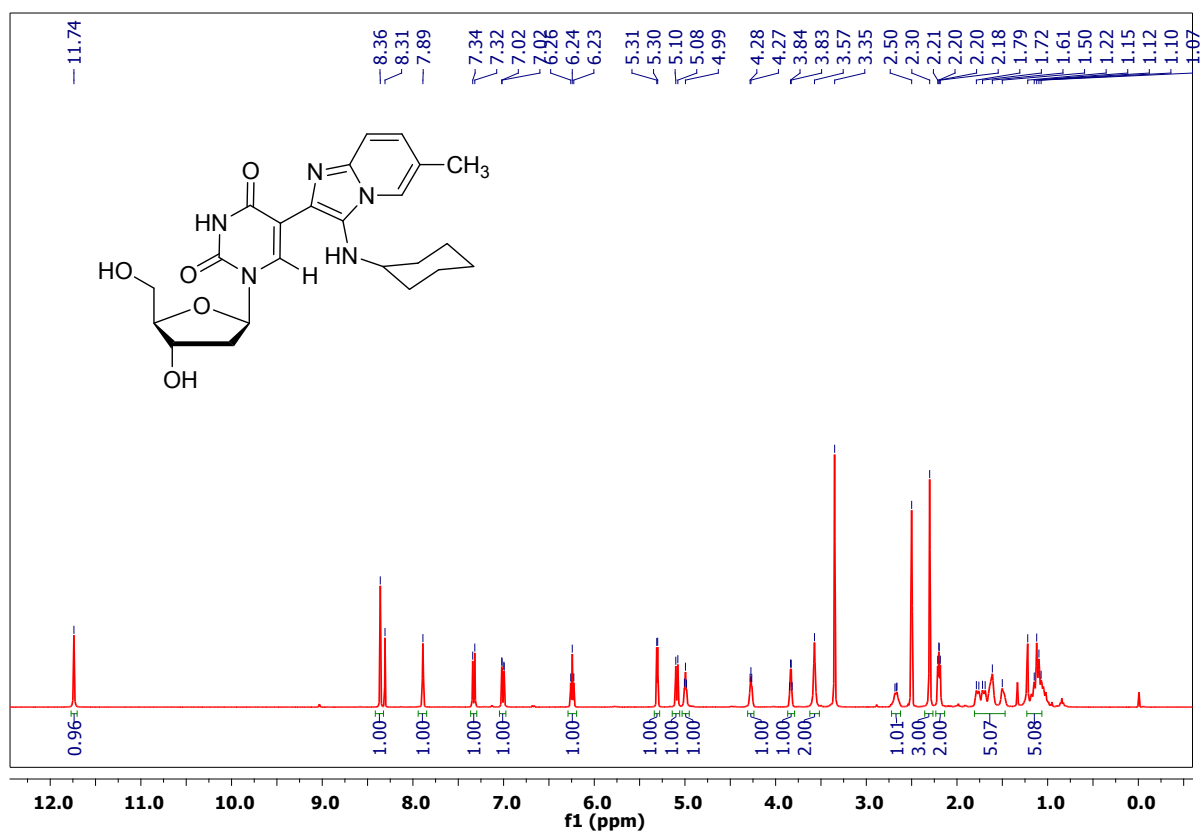

**Figure 49:**  $^1\text{H}$  NMR spectrum of compound **5j** (400 MHz,  $\text{DMSO-}d_6$ )

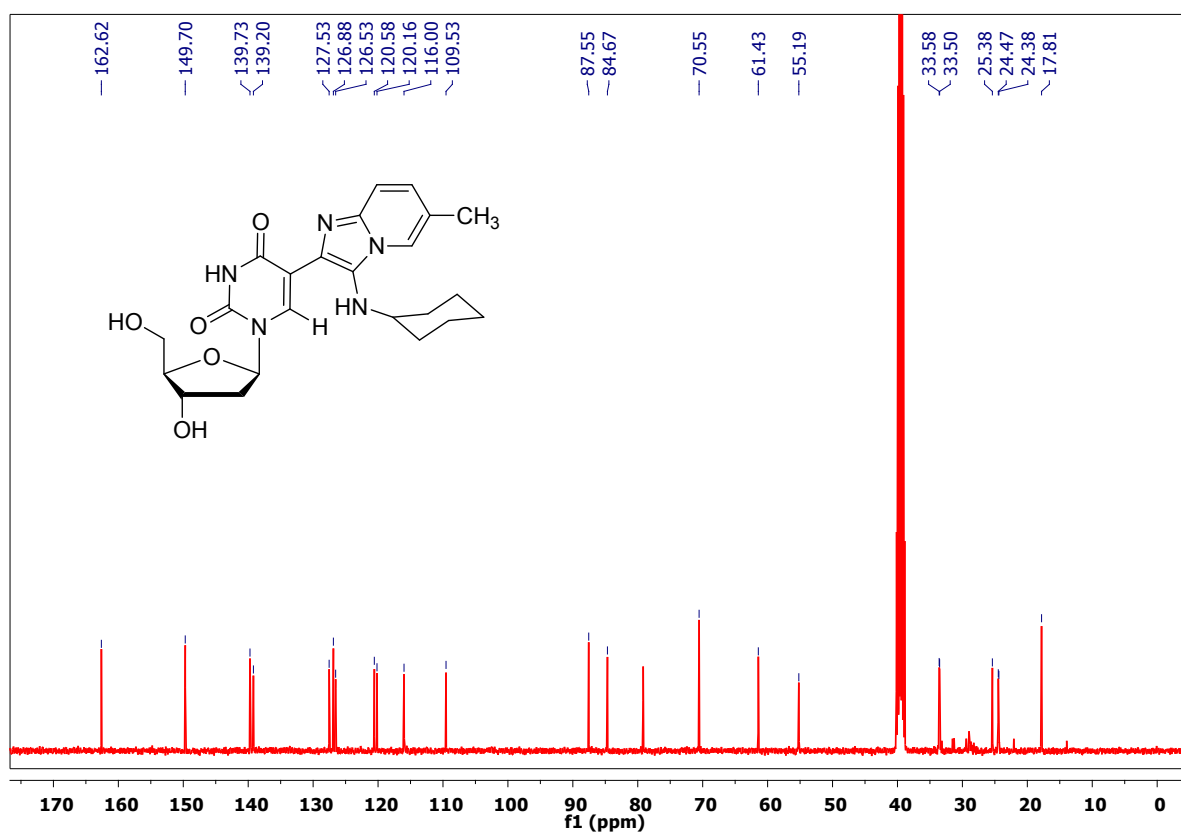

**Figure 50:**  $^{13}\text{C}$  NMR spectrum of compound **5j** (100 MHz,  $\text{DMSO-}d_6$ )

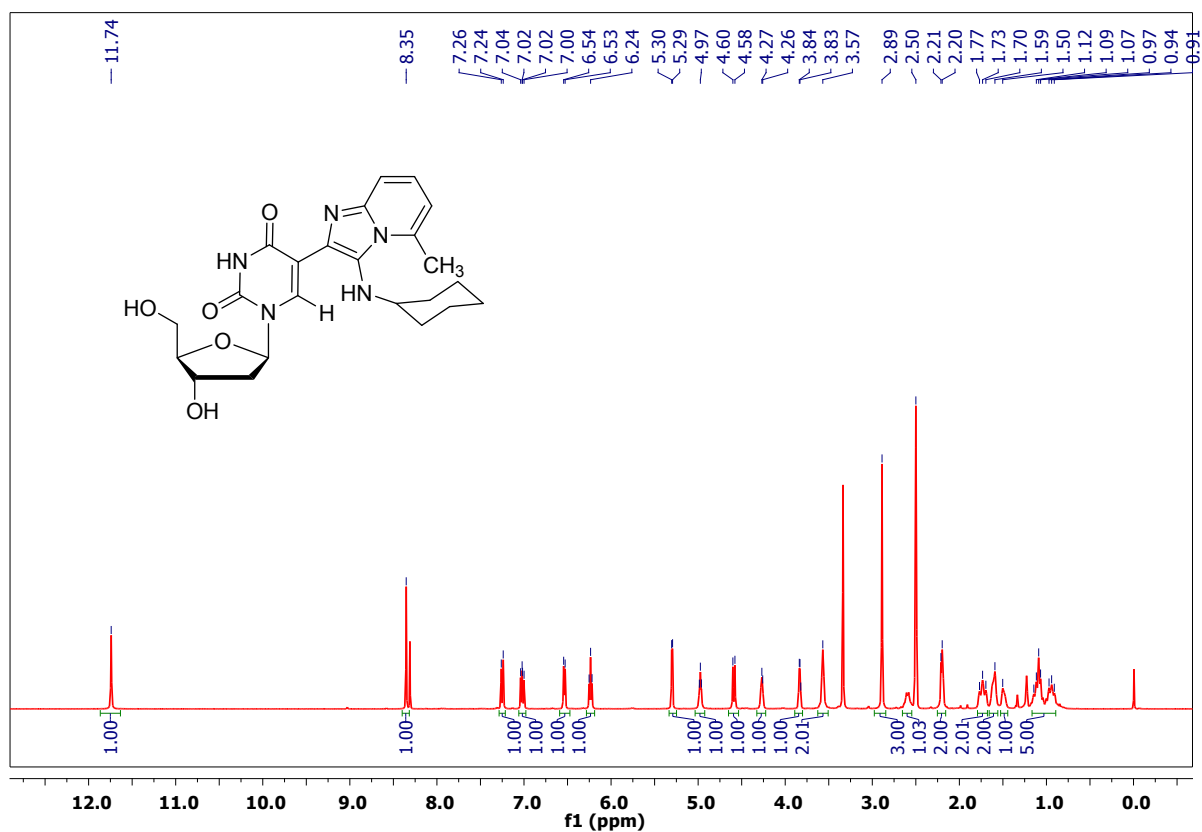

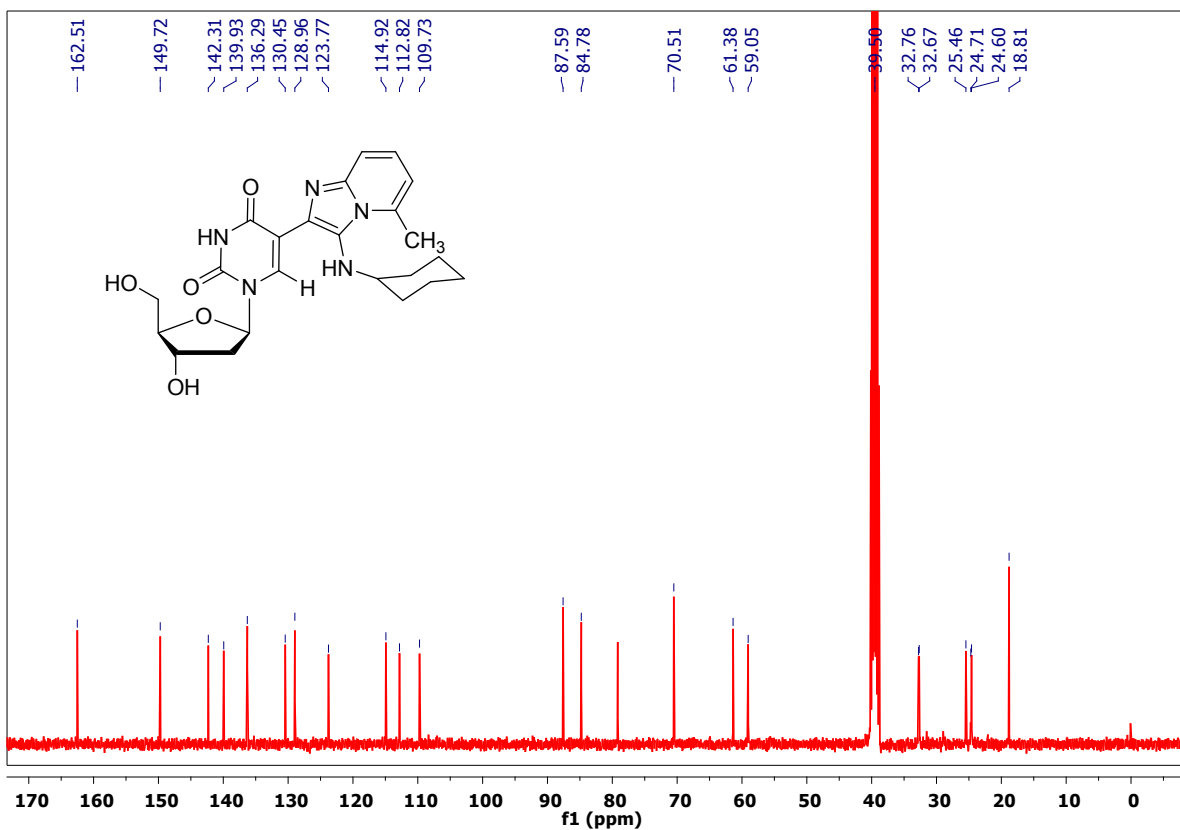

Figure 52:  $^{13}\text{C}$  NMR spectrum of compound 5k (100 MHz,  $\text{DMSO}-d_6$ )

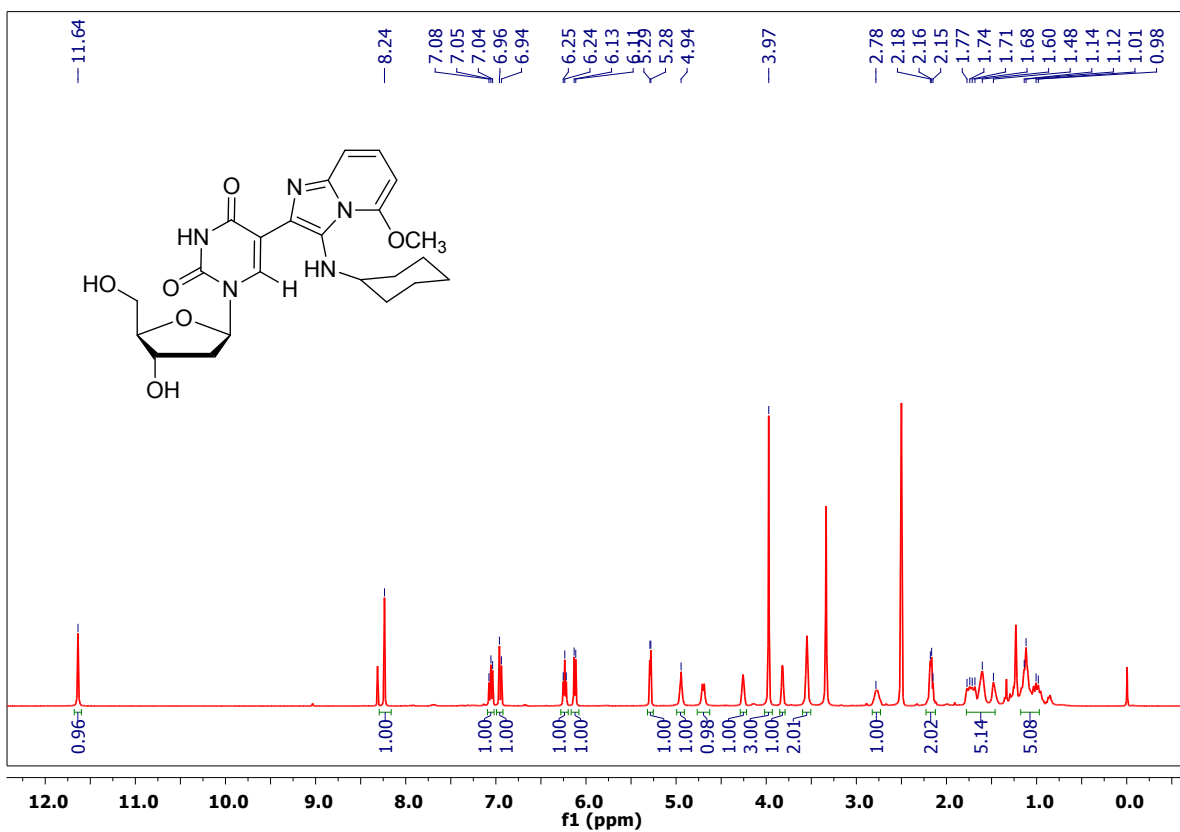

**Figure 53:**  $^1\text{H}$  NMR spectrum of compound **5I** (400 MHz,  $\text{DMSO-}d_6$ )

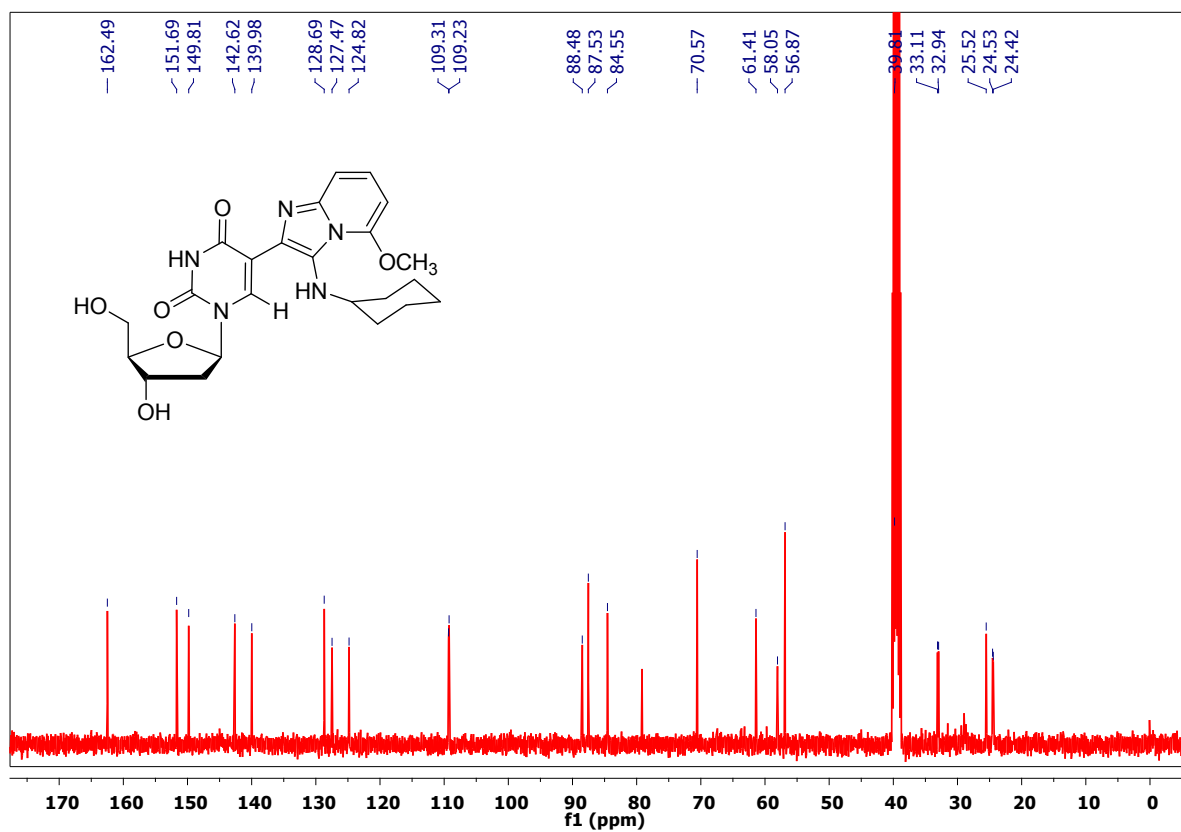

**Figure 54:**  $^{13}\text{C}$  NMR spectrum of compound **5I** (100 MHz,  $\text{DMSO-}d_6$ )

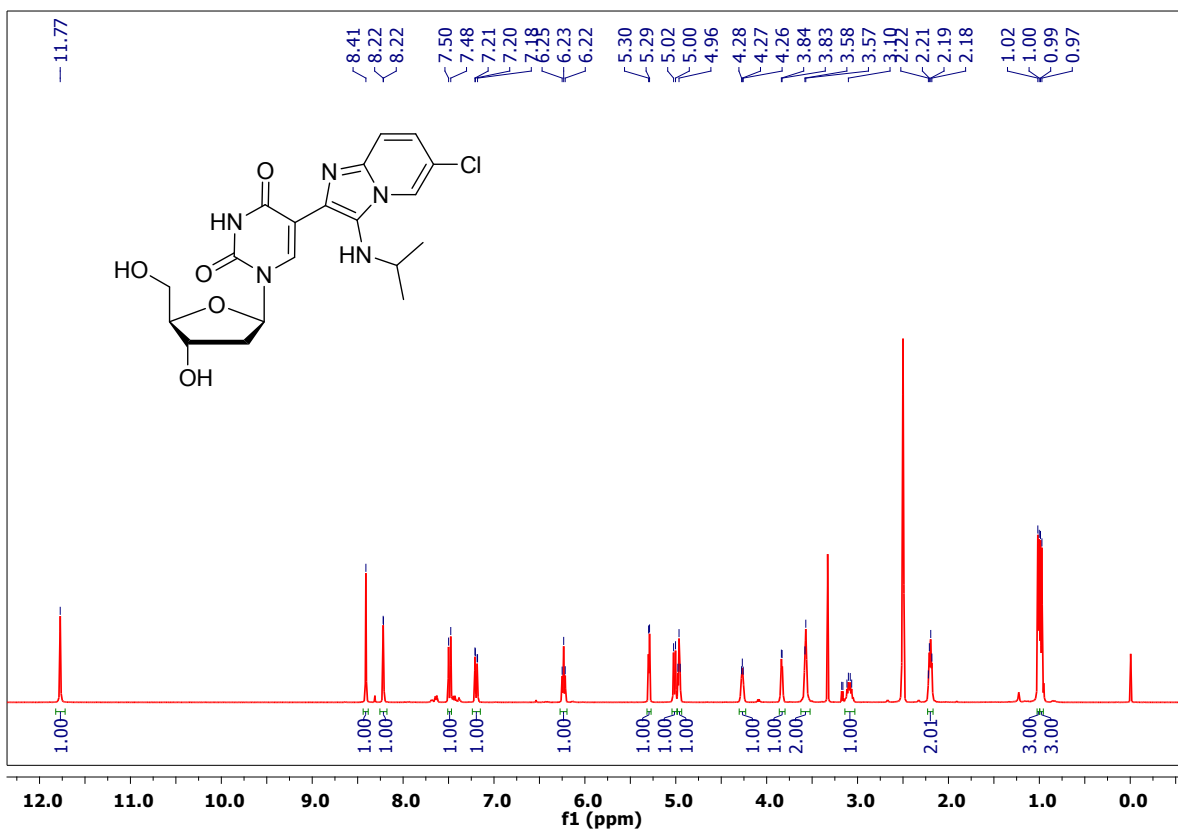

Figure 55: <sup>1</sup>H NMR spectrum of compound **5m** (400 MHz, DMSO-*d*<sub>6</sub>)

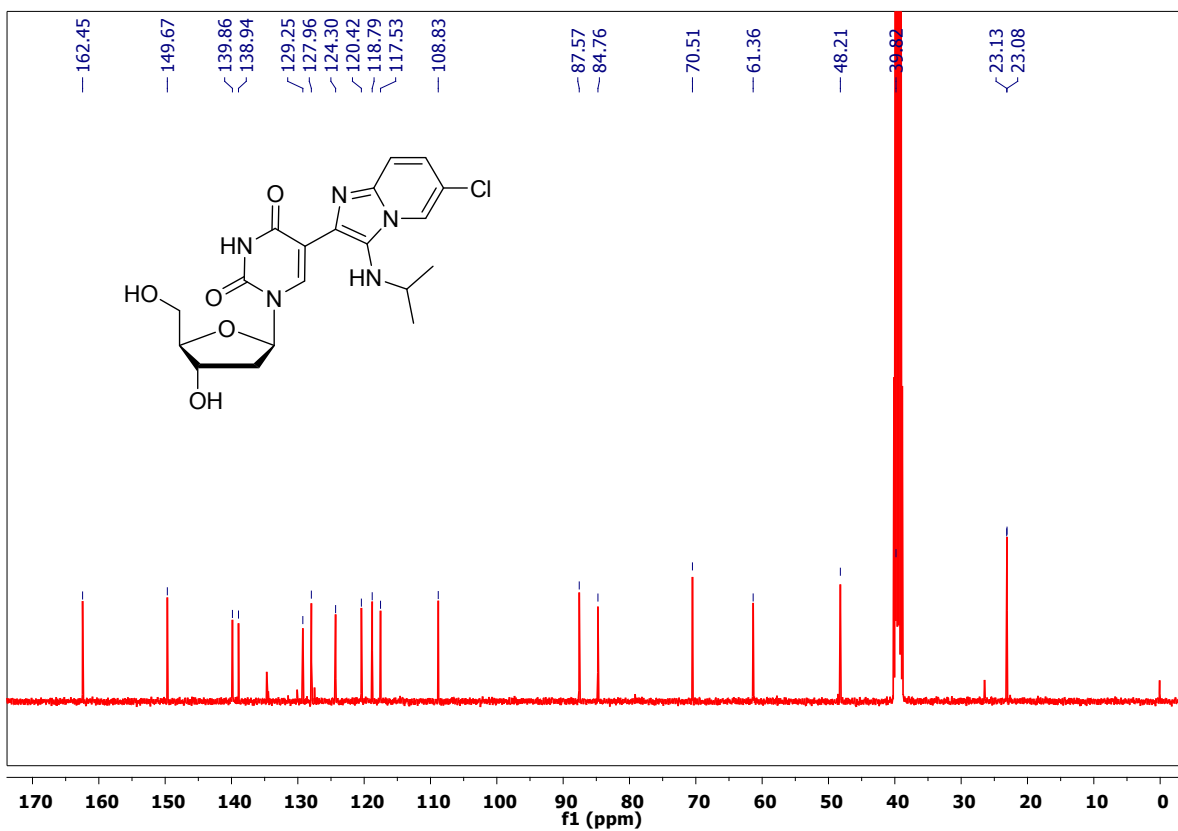



**Figure 56:**  $^{13}\text{C}$  NMR spectrum of compound **5m** (100 MHz,  $\text{DMSO-}d_6$ )

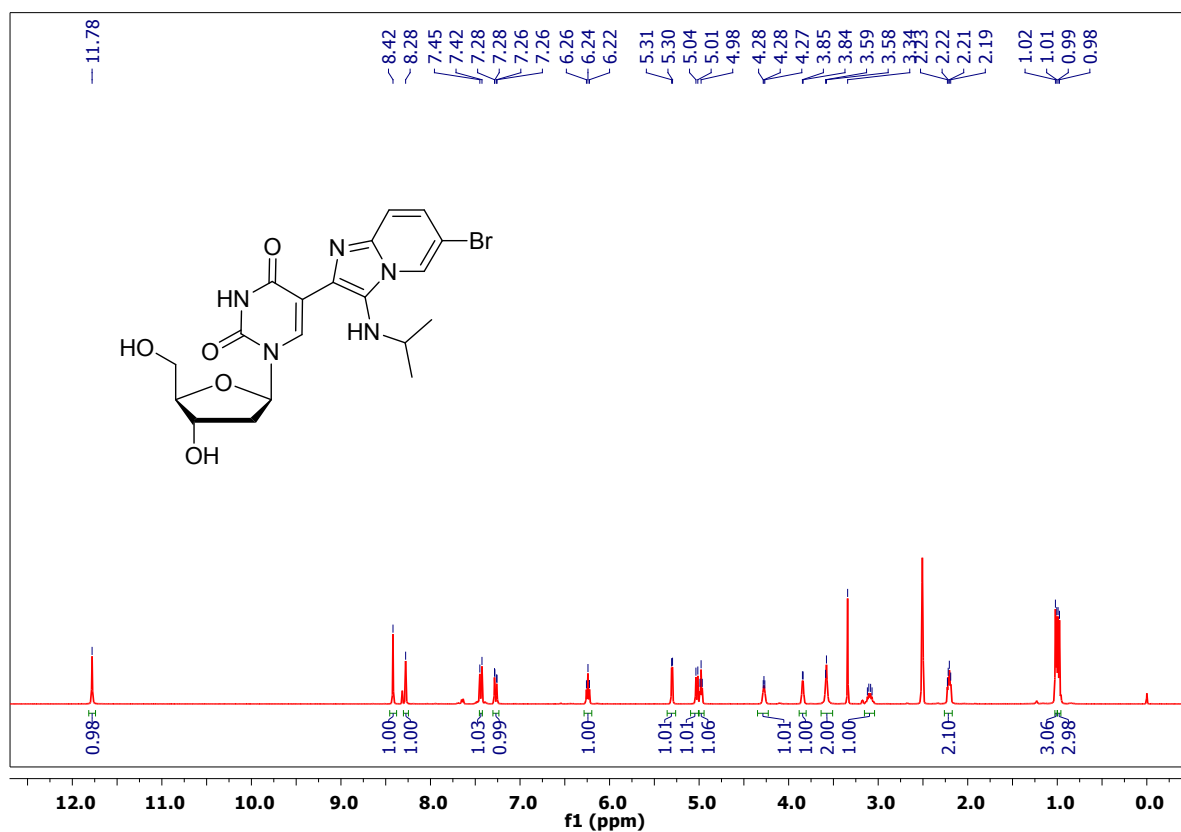

**Figure 57:**  $^1\text{H}$  NMR spectrum of compound **5n** (400 MHz,  $\text{DMSO-}d_6$ )

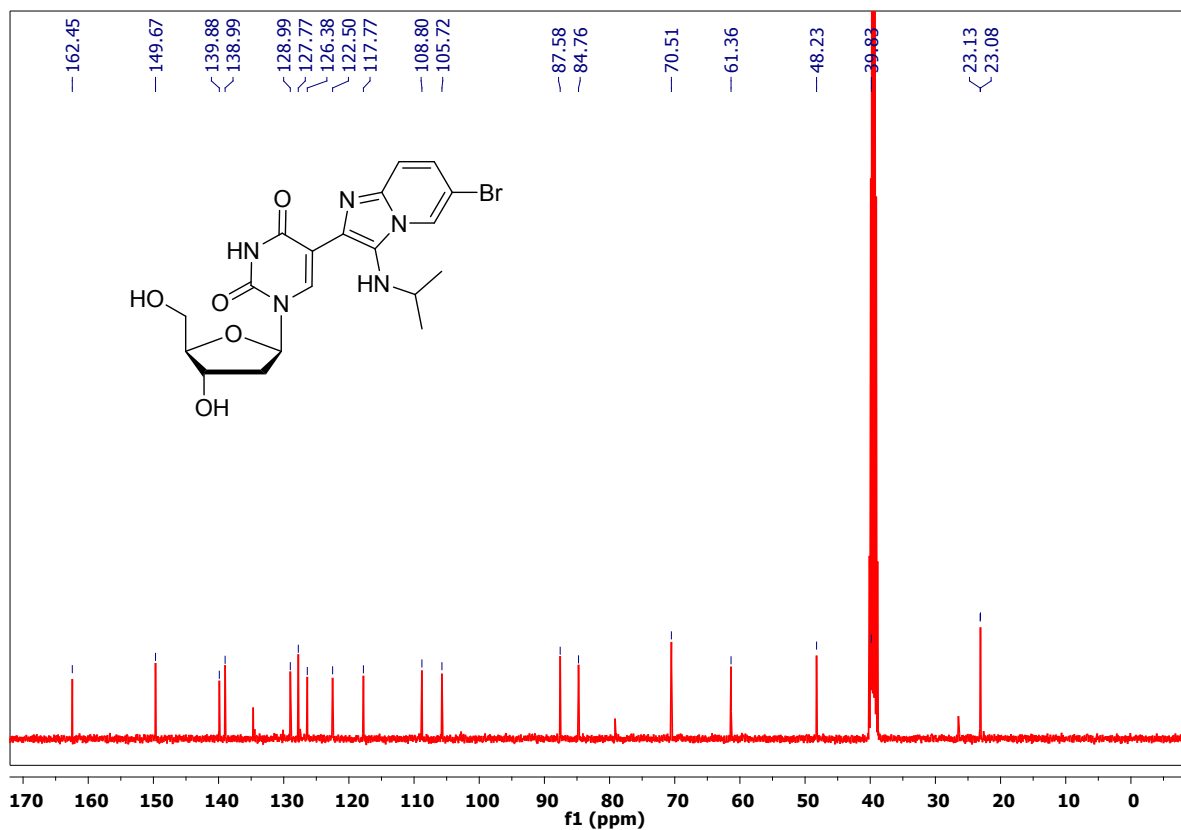

**Figure 58:**  $^{13}\text{C}$  NMR spectrum of compound **5n** (100 MHz,  $\text{DMSO-}d_6$ )

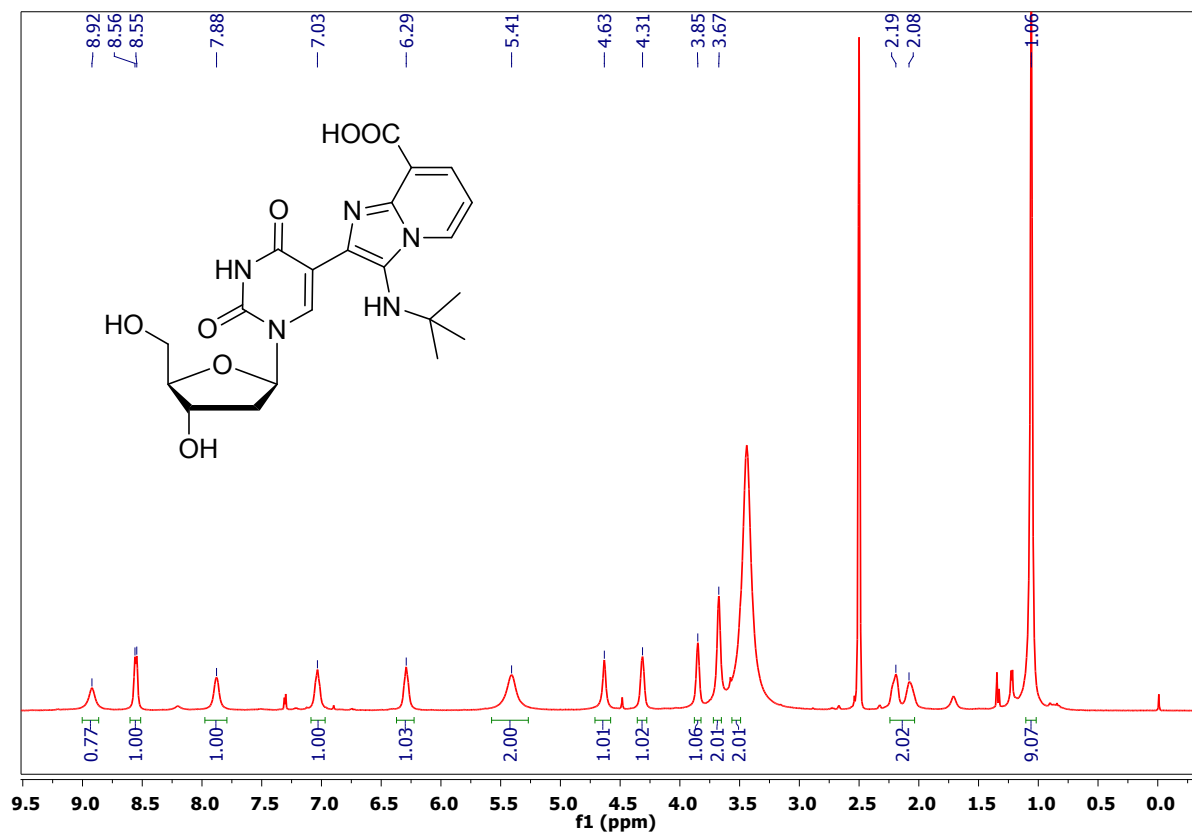

**Figure 57:**  $^1\text{H}$  NMR spectrum of compound **5p** (400 MHz,  $\text{DMSO-}d_6$ )

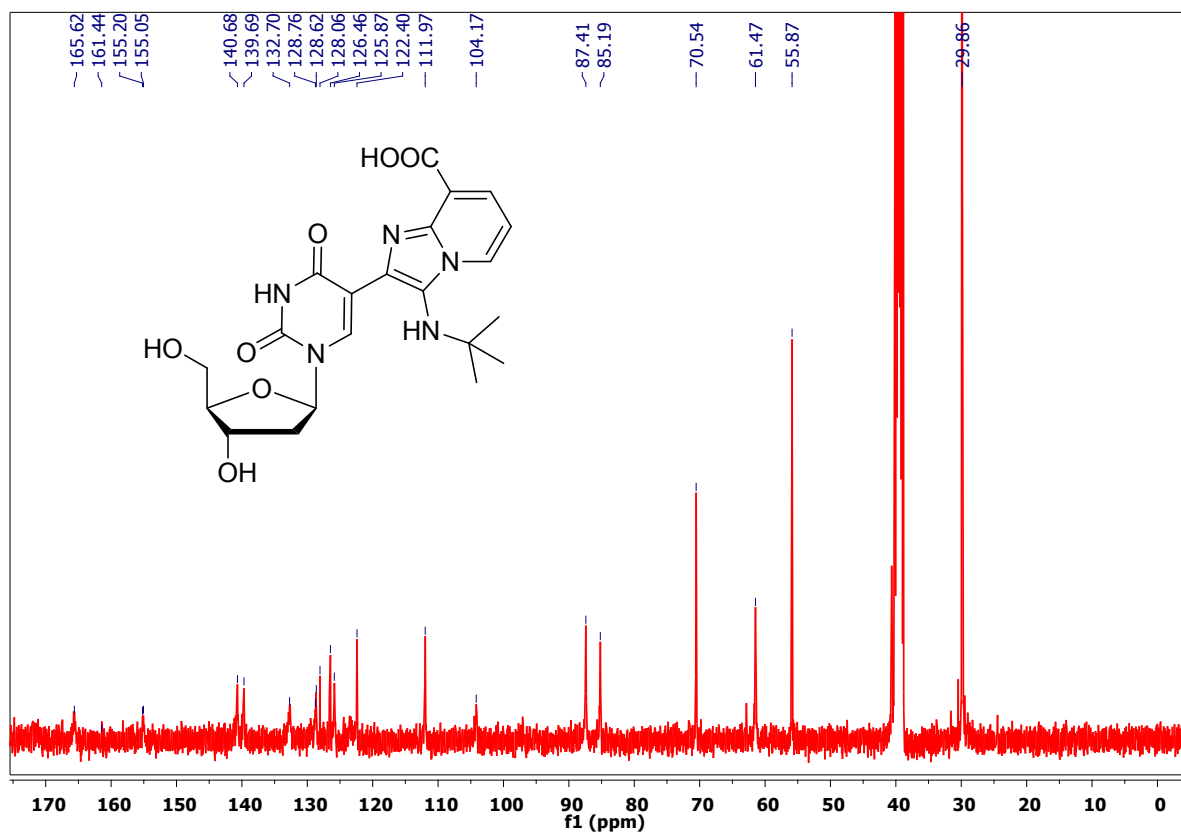

**Figure 58:**  $^{13}\text{C}$  NMR spectrum of compound **5p** (100 MHz,  $\text{DMSO-}d_6$ )

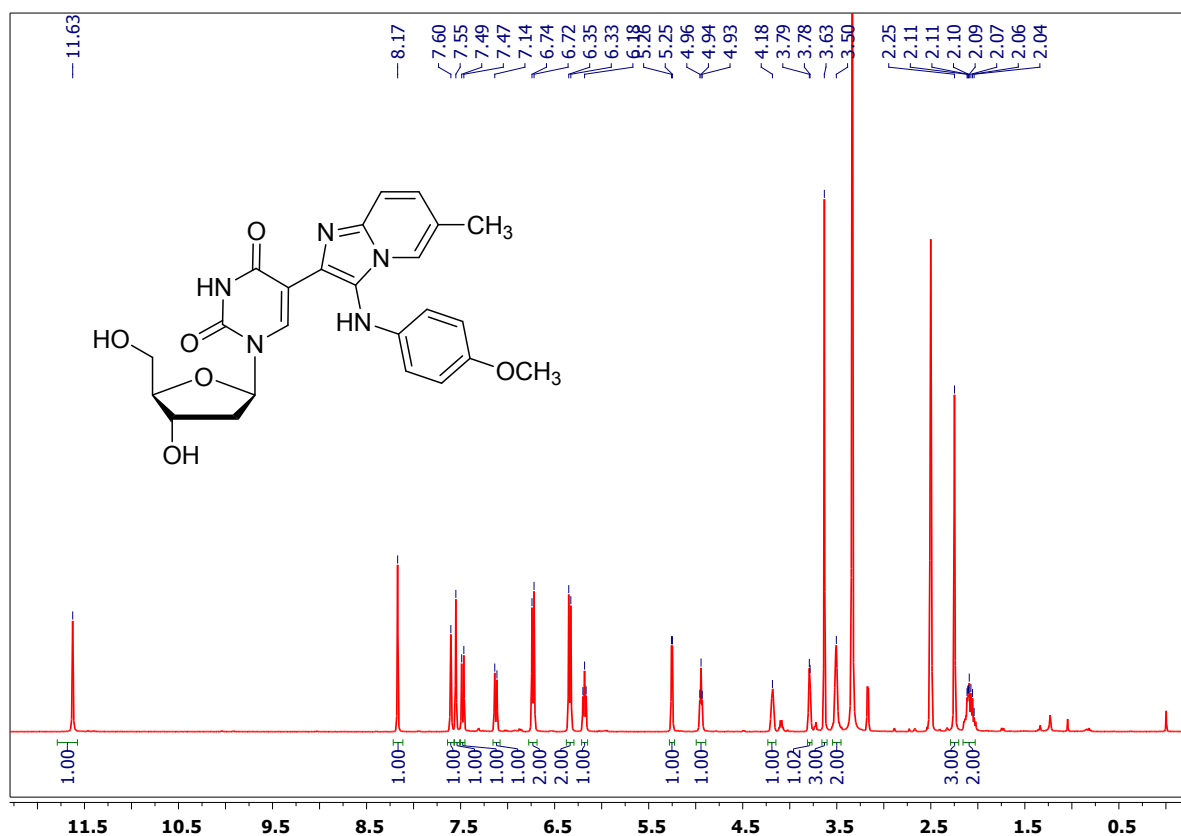

**Figure 57:  $^1\text{H}$  NMR spectrum of compound **5p** (400 MHz,  $\text{DMSO-}d_6$ )**

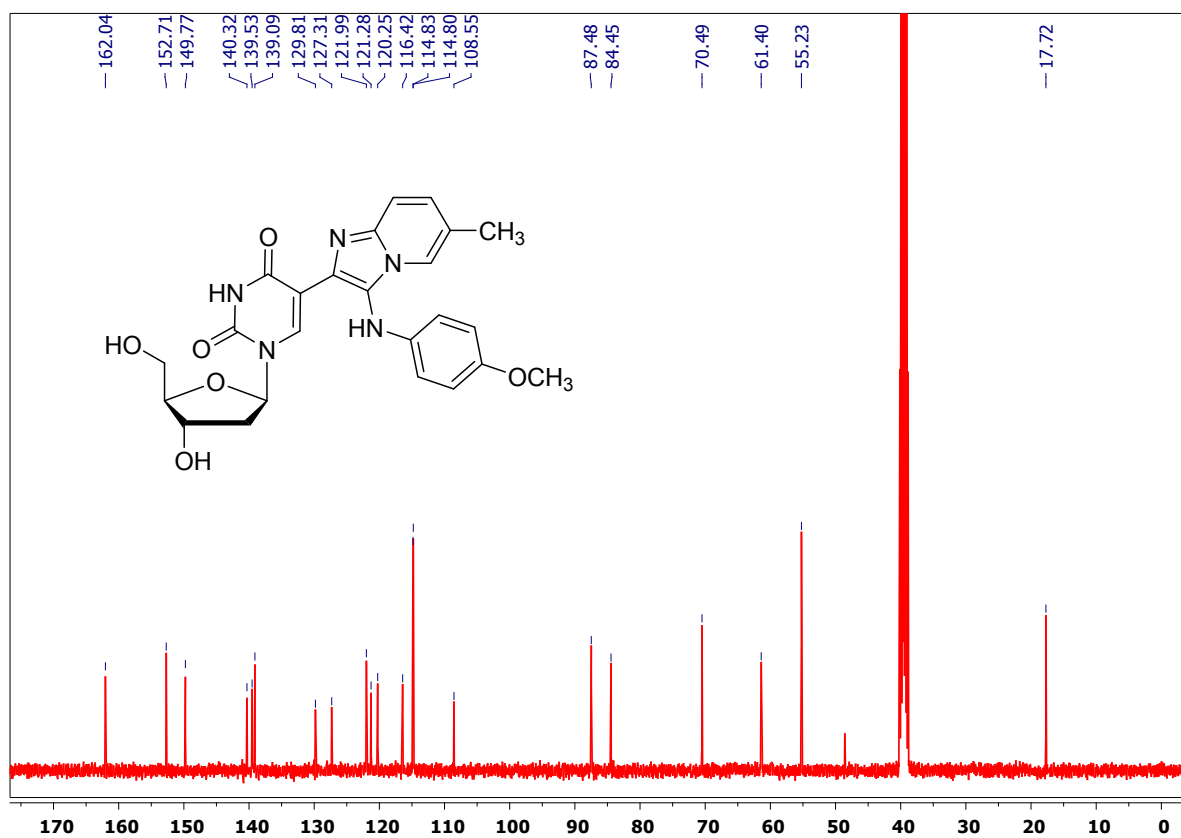

**Figure 58:**  $^{13}\text{C}$  NMR spectrum of compound **5p** (100 MHz,  $\text{DMSO-}d_6$ )
